1 **Proteome, bioinformatic and functional analyses reveal a distinct and conserved**  
2 **metabolic pathway for bile salt degradation in the *Sphingomonadaceae***

3

4 Franziska M. Feller<sup>1</sup>, Lars Wöhlbrand<sup>2</sup>, Johannes Holert<sup>1</sup>, Vanessa Schnaars<sup>2</sup>, Lea  
5 Elsner<sup>1#</sup>, William W. Mohn<sup>3</sup>, Ralf Rabus<sup>2</sup>, and Bodo Philipp<sup>1,4\*</sup>

6

7 <sup>1</sup> Microbial Biotechnology and Ecology, Institute for Molecular Microbiology and  
8 Biotechnology, Westfälische Wilhelms-Universität Münster, Münster, Germany

9 <sup>2</sup>General and Molecular Microbiology, Institute for Chemistry and Biology of the Marine  
10 Environment (ICBM), Carl von Ossietzky University of Oldenburg, Oldenburg, Germany

11 <sup>3</sup>Department of Microbiology and Immunology, Life Sciences Institute, University of  
12 British Columbia, Vancouver, Canada

13 <sup>4</sup>Applied Ecology and Bioresources, Fraunhofer-Institute for Molecular and Applied  
14 Ecology IME, Schmallenberg, Germany

15 #Current address: Medizinisches Labor Wahl, Lüdenscheid, Germany

16 \*Corresponding author: Bodo Philipp

17 E-Mail: [bodo.philipp@uni-muenster.de](mailto:bodo.philipp@uni-muenster.de); Tel.: (+49) 251 8339827; Fax: (+49) 251  
18 8338388; Adress: Institut für Molekulare Mikrobiologie und Biotechnologie, Westfälische  
19 Wilhelms-Universität Münster, Corrensstr. 3, 48149 Münster, Germany.

20

21 **Running title:**

22 Bile salt degradation by *Sphingomonadaceae*

23 **Abstract**

24 Bile salts are amphiphilic steroids with a C<sub>5</sub> carboxylic side chain with digestive functions  
25 in vertebrates. Upon excretion, they are degraded by environmental bacteria.  
26 Degradation of the bile-salt steroid skeleton resembles the well-studied pathway for  
27 other steroids like testosterone, while specific differences occur during side-chain  
28 degradation and the initiating transformations of the steroid skeleton. Of the latter, two  
29 variants via either  $\Delta^{1,4}$ - or  $\Delta^{4,6}$ -3-ketostructures of the steroid skeleton exist for 7-hydroxy  
30 bile salts. While the  $\Delta^{1,4}$ - variant is well-known from many model organisms, the  $\Delta^{4,6}$ -  
31 variant involving a 7-hydroxysteroid dehydratase as key enzyme has not been  
32 systematically studied. Here, combined proteomic, bioinformatic and functional  
33 analyses of the  $\Delta^{4,6}$ -variant in *Sphingobium* sp. strain Chol11 were performed. They  
34 revealed a degradation of the steroid rings similar to the  $\Delta^{1,4}$ -variant except for the  
35 elimination of the 7-OH as key difference. In contrast, differential production of the  
36 respective proteins revealed a putative gene cluster for side-chain degradation encoding  
37 a CoA-ligase, an acyl-CoA dehydrogenase, a Rieske monooxygenase, and an amidase,  
38 but lacking most canonical genes known from other steroid-degrading bacteria.  
39 Bioinformatic analyses predicted the  $\Delta^{4,6}$ -variant to be widespread among the  
40 *Sphingomonadaceae*, which was verified for three type strains which also have the  
41 predicted side-chain degradation cluster. A second amidase in the side-chain  
42 degradation gene cluster of strain Chol11 was shown to cleave conjugated bile salts  
43 while having low similarity to known bile-salt hydrolases. This study signifies members of  
44 the *Sphingomonadaceae* remarkably well-adapted to the utilization of bile salts via a  
45 partially distinct metabolic pathway.

46 **Importance**

47 This study highlights the biochemical diversity of bacterial degradation of steroid  
48 compounds, in particular bile salts. Furthermore, it substantiates and advances  
49 knowledge of a variant pathway for degradation of steroids by sphingomonads, a group  
50 of environmental bacteria that are well-known for their broad metabolic capabilities.  
51 Biodegradation of bile salts is a critical process due to the high input of these  
52 compounds from manure into agricultural soils and wastewater treatment plants. In  
53 addition, these results may also be relevant for the biotechnological production of bile  
54 salts or other steroid compounds with pharmaceutical functions.

## 55 **Introduction**

56 Bile salts are multifunctional steroidal compounds that act as detergents in the digestion  
57 of lipophilic nutrients and exhibit signaling function in vertebrates (1, 2). The amphiphilic  
58 character of mammalian bile salts is determined by a carboxylic C<sub>5</sub> side chain at C17  
59 and one to three hydroxy groups on the steroid nucleus. Bile salts are produced from  
60 cholesterol in the liver, conjugated to taurine or glycine via amide bonds and excreted  
61 into the gastrointestinal tract. In the intestine, free bile salts are released by  
62 deconjugation catalyzed by bile-salt hydrolases produced by intestinal bacteria (3).  
63 Although most bile salts are reabsorbed (4, 5), about 0.4 – 0.6 g of bile salts are  
64 excreted per day by each human (6), adding up to about 18 t of bile salts excreted per  
65 year by the population of a city with 100,000 inhabitants.

66 Upon excretion, bile salts become an energy and carbon source for environmental  
67 bacteria (7, 8) and several bile-salt degrading bacteria have been isolated from soils and  
68 aquatic habitats (9–12). These include *Rhodococcus jostii* RHA1 (13), *Comamonas*  
69 *testosteroni* CNB-2 and TA441 (14), *Pseudomonas stutzeri* Chol1 (9), *Pseudomonas*  
70 sp. strain DOC21 (11), *Azoarcus* sp. strain Aa7 (12), and *Sphingobium* sp. strain  
71 Chol11, formerly *Novosphingobium* sp. strain Chol11 (10). Aerobic bile salt degradation  
72 proceeds similar to the degradation of other steroids such as cholesterol and can be  
73 divided into different phases (Fig 1) (7, 8, 15): 1) Oxidation of the A-ring, 2) side-chain  
74 degradation, 3) oxygenolytic cleavage of ring B, and 4) oxygenolytic and hydrolytic  
75 degradation of the remaining *seco*-steroid. The first three steps may occur  
76 simultaneously (16–18).

77 In *R. jostii* RHA1, *C. testosteroni* TA441, and *P. stutzeri* Chol1, bile-salt degradation  
78 proceeds through the well-elucidated 9,10-*seco* pathway. In phase 1, oxidative reactions

79 at the A-ring generate intermediates with a  $\Delta^{1,4}$ -3-keto structure of the steroid skeleton  
80 (7, 13, 14). During degradation of the trihydroxy bile-salt model-substrate cholate (I in  
81 Fig 1), this leads to formation of  $\Delta^{1,4}$ -3-ketocholate (III) (16). In phase 2, the bile-salt  
82 side-chain is degraded by the successive release of acetyl-CoA and propionyl-CoA (16,  
83 19, 20). In actinobacteria such as *R. jostii* RHA1 acetyl-CoA is predicted to be released  
84 by  $\beta$ -oxidation (13). In proteobacteria such as *P. stutzeri* Chol1 acetyl-CoA is released  
85 by an aldolase-mediated cleavage reaction and subsequent oxidation of the resulting  
86 aldehyde group (19, 21). Both mechanisms of side-chain degradation result in  
87 intermediates with C<sub>3</sub> carboxylic side chains (16, 17, 21, 22). In actino- as well as  
88 proteobacteria, this C<sub>3</sub> side chain is released as propionyl-CoA by a second cycle of  
89 aldolytic cleavage reactions (22–24) resulting in C<sub>19</sub> steroids, so-called androsta-1,4-  
90 diene-3,17-diones (ADDs); in the case of cholate, 7,12 $\beta$ -dihydroxy-ADD (12 $\beta$ -DHADD,  
91 IV) is formed (9, 13, 20).

92 In phase 3, degradation of the steroidal ring system is initiated by the introduction of a  
93 hydroxy group at C9 by the monooxygenase KshAB (17), which leads to spontaneous  
94 opening of the B-ring driven by the aromatization of ring A. This produces 9,10-*seco*  
95 intermediates such as 3,7,12-trihydroxy-9,10-*seco*-androsta-1,3,5-triene-9,17-dione  
96 (THSATD, V). Phase 4 starts with the *meta*-cleavage of the aromatic A-ring and  
97 hydrolytic cleavage of the former A-ring, which results in *H*-methyl-hexahydro-indanone-  
98 propanoate (HIP, VI) intermediates (7, 8). At this stage of degradation, intermediates  
99 from differently hydroxylated bile salts are channeled into a common pathway in *P.*  
100 *stutzeri* Chol1 (23). In this process, the former 12-OH is removed and a hydroxy group at  
101 former C7 is introduced into 7-deoxy-bile salt derivatives during  $\beta$ -oxidation of the former

102 B-ring. Further degradation of HIPs proceeds via  $\beta$ -oxidation of the former B-ring and  
103 hydrolytic cleavages of rings C and D (25, 26).

104 In contrast to this well elucidated pathway, degradation of 7-hydroxy-bile salts such as  
105 cholate (I in Fig 1) proceeds differently in *Spingobium* sp. strain Chol11 (10), but can  
106 also be divided into the four phases. After the initial formation of  $\Delta^4$ -3-keto-intermediates  
107 such as  $\Delta^4$ -3-ketocholate (II in Fig 1) in phase 1, the hydroxy group at C7 is eliminated  
108 by the 7 $\alpha$ -hydroxy steroid dehydratase Hsh2 (27). This leads to the formation of a  
109 double bond in the B-ring and to  $\Delta^{4,6}$ -intermediates such as 12-hydroxy-3-oxo-chol-4,6-  
110 dienoate (HOCD, VII) (10). This variant of the pathway will be referred to as  $\Delta^{4,6}$ -  
111 variant, in contrast to the  $\Delta^{1,4}$ -variant described above (28). As  $\Delta^{4,6}$ -derivatives of ADDs  
112 such as 12-hydroxy-androsta-1,4,6-triene-3,17-dione (HATD, VIII) can be found in  
113 culture supernatants of strain Chol11 growing with cholate (10), side chain degradation  
114 seems to be the next phase (phase 2) of degradation. This is initiated by CoA-activation  
115 catalyzed by CoA-ligase SclA (29). In contrast to the model organisms using the  $\Delta^{1,4}$ -  
116 variant, *Spingobium* sp. strain Chol11 growing with cholate produces no intermediates  
117 with a shortened side chain that can be found in culture supernatants (10). Interestingly,  
118 many genes for side-chain degradation known from other model organisms are missing  
119 in strain Chol11 (29, 30). The fact that several KshA homologs and many HIP  
120 degradation proteins are encoded in the genome of strain Chol11 suggests that phases  
121 3 and 4, cleavage of the B-ring and further degradation of the *seco*-steroid, proceed  
122 similar to the 9,10-*seco*-pathway (29).

123 To further elucidate bile-salt degradation in strain Chol11 via the  $\Delta^{4,6}$ -pathway variant,  
124 differential proteome analyses of substrate-adapted cells were performed. For this,  
125 cholate (I in Fig 1) was used as a model substrate for the  $\Delta^{4,6}$ -variant. This was

126 compared to the 7-deoxy bile salt deoxycholate (XX in Fig 7), since 7-deoxy bile salts  
127 cannot be degraded via  $\Delta^{4,6}$ -intermediates (27), and therefore require either completely  
128 different pathways or variations of one common pathway. As a further reference  
129 substrate, 12 $\beta$ -DHADD (IV in Fig 1) was used, because it does not possess a side chain  
130 and therefore might reveal proteins that are specific for side-chain degradation.

## 131 **Results and Discussion**

### 132 **Proteome analyses reveal three gene clusters encoding bile-salt degradation**

133 To assess inducibility of cholate degradation in *Sphingobium* sp. strain Chol11, cholate-  
134 and glucose-grown cells were compared. Suspensions of cholate-adapted cells depleted  
135 cholate more quickly than those adapted to glucose (Fig S1A). When protein synthesis  
136 was inhibited by chloramphenicol, cholate was still completely degraded by cholate-  
137 adapted cells, but only a low percentage was depleted by glucose-adapted cells paralleled  
138 by continuous production of HOCDA (VII in Fig 1) (Fig S1A+B). These findings indicate  
139 inducibility of cholate degradation in strain Chol11, with enzymes for A-ring oxidation  
140 and 7 $\alpha$ -dehydroxylation constitutively produced but those for degradation of the side  
141 chain and the steroid nucleus requiring *de novo* synthesis in glucose-grown cells.

142 Thus, the proteomic profiles of cholate-, deoxycholate-, and 12 $\beta$ DHADD-grown cells  
143 were compared to that of glucose-grown cells using two-dimensional difference gel  
144 electrophoresis (2D DIGE), whole-cell shotgun proteomics, and analyses of the  
145 membrane protein enriched fractions (Tab S1). In total, 44.6% of the 3,550 predicted  
146 proteins of strain Chol11 were detected (Fig S2A). Proteins from the COG categories,  
147 “inorganic ion transport and metabolism” and “lipid transport and metabolism” showed  
148 the highest increase in abundance in cholate-grown cells compared to glucose-grown  
149 cells (Fig S2B).

150 The majority of proteins detected with significantly higher abundances in steroid- versus  
151 glucose-grown cells are encoded on chromosome 2 where most predicted steroid-  
152 degradation genes in strain Chol11 are located (30). 75 proteins had significantly higher  
153 abundances in cells grown on bile salts versus glucose, according to 2D-DIGE analysis.



154 Most of these proteins are encoded in three gene clusters (Fig 2), of which one (cluster  
155 3) was previously predicted to encode steroid-degradation (29).

156 The finding, that the same set of proteins is produced in higher quantities during growth  
157 with both bile salts and most proteins were also produced for 12 $\beta$ -DHADD degradation  
158 indicates that degradation of these steroids generally involves the same proteins. This  
159 implies that both 7-hydroxy- and 7-deoxy-bile salts are degraded via the same pathway.  
160 Notably, however, a subset of proteins encoded in gene cluster 2 is differentially  
161 abundant, depending on the presence of a side chain. This implicates the proteins  
162 encoded in gene cluster 2 might be specific for side-chain degradation. Based on  
163 proteome and bioinformatic analyses, we compiled a model of bile-salt degradation in  
164 strain Chol11 (Fig 3).

165

### 166 **Steroid transport**

167 Several TonB-dependent receptor proteins (COG category “inorganic ion transport and  
168 metabolism”) were among the membrane proteins with the increases in abundance,  
169 including Nov2c232 (gene cluster 2), Nov2c378 (near gene cluster 3), and Nov2c659  
170 (near gene cluster 4). TonB-dependent outer membrane transporter proteins (called  
171 TonB-dependent receptor protein) require the accessory proteins TonB, ExbB, and  
172 ExbD in the inner membrane to form a functional TonB-system (31). These accessory  
173 proteins were identified in the membrane protein-enriched fractions of cells grown on all  
174 substrates with similar Mascot scores, indicating constitutive formation (Nov1c1853-  
175 1856). Transporters for the uptake of bile salts are not known in Proteobacteria but there  
176 are indications that TonB-dependent receptors could be involved. First, they are  
177 generally known to participate in the import of complex growth substrates such as lignin

178 degradation compounds (32). Second, in *Novosphingobium tardaugens* NBRC16725, a  
179 TonB-dependent receptor was upregulated in estradiol-grown cells, and a corresponding  
180 deletion mutant showed reduced growth with estradiol (33).

181 The TonB-dependent receptor Nov2c232 (28 % identity to the TonB-dependent receptor  
182 that was deleted in *N. tardaugens* NBRC16725) is encoded in the putative side-chain  
183 degradation cluster in close vicinity to a gene encoding a transporter of the Major  
184 Facilitator Superfamily (MFS) (Nov2c225), and both were more abundant in cholate- and  
185 deoxycholate-grown cells (Fig 4, Table S1). These could be involved in transport of bile  
186 salts as well as early degradation intermediates such as  $\Delta^4$ -3-ketocholate (II in Fig 1) or  
187 HOODA (VII), that are found in strain Chol11 culture supernatants (10, 28). Such  
188 transient extracellular accumulation of intermediates (10) is a common for bile-salt  
189 degrading Proteobacteria and has been observed during bile-salt degradation in soil  
190 (34). Thus, the above transporters could alternatively be involved in intermediate efflux.

191

### 192 **Phase 1: A-ring oxidation and B-ring dehydration (blue section in Fig 3)**

193 **3 $\alpha$ -Hydroxysteroid dehydrogenase.** The first step of bile-salt degradation is the  
194 oxidation of 3-OH to a keto group by a 3 $\alpha$ -hydroxy steroid dehydrogenase (3 $\alpha$ -HSD) (27,  
195 35). A putative 3 $\alpha$ -HSD (Nov2c6) is encoded in gene cluster 1 (Figs 4,5). This protein  
196 was present in lower abundances in glucose- versus steroid-grown cells (Fig 4).  
197 Additional putative 3 $\alpha$ -HSDs, Nov2c397 and Nov2c683, are encoded close to gene  
198 clusters 3 and 4, respectively, and were not differentially expressed. This as well as  
199 Nov2c6 being present in low abundances in glucose-adapted cells is consistent with  
200 biotransformation experiments showing that oxidation of the 3-OH is constitutive in strain  
201 Chol11.

202 **5 $\beta$ - $\Delta^4$ -3-Ketosteroid dehydrogenase.** The next step is the introduction of a double  
203 bond in the A-ring by 5 $\beta$ - $\Delta^4$ -3-ketosteroid dehydrogenase (5 $\beta$ - $\Delta^4$ -KSTD, named 5 $\beta$ - $\Delta^4$ -  
204 KSTD1) (28). 5 $\beta$ - $\Delta^4$ -KSTD1 is encoded in cluster 1 (Nov2c19) and is much more  
205 abundant in steroid- versus glucose-grown cells (>5.5-fold, Fig 4).

206 **7 $\alpha$ -Hydroxysteroid dehydratase.** The key enzyme of the  $\Delta^{4,6}$ -pathway in strain Chol11,  
207 the 7 $\alpha$ -hydroxysteroid dehydratase Hsh2 (Nov2c400), introduces a double bond in the  
208 B-ring by elimination of water (27). The *hsh2* gene is located in close proximity to cluster  
209 3. Hsh2 was previously shown to be active in glucose-grown cells (28), in agreement  
210 with its similar abundance in all cells (Fig 4).

211  **$\Delta^1$ -3-Ketosteroid dehydrogenase.** In the  $\Delta^{1,4}$ -variant bile-salt degradation pathway, the  
212 next step is the introduction of a second double bond in the A-ring at C1 by a  $\Delta^1$ -3-  
213 ketosteroid dehydrogenase ( $\Delta^1$ -KSTD), which is a structural prerequisite for subsequent  
214 cleavage of the B-ring. The formation of  $\Delta^{1,4,6}$ -intermediates such as HATD (VIII in Fig 1)  
215 during growth with bile salts shows, that this reaction also occurs in strain Chol11 (10).  
216 Putative  $\Delta^1$ -KSTDs (36, 37) are Nov2c82 (encoded between gene clusters 1 and 2, not  
217 detected in any condition), and Nov2c695 (encoded close to gene cluster 4, about 2- to  
218 3-fold increased abundance in steroid-grown cells) (Fig 4). This expression pattern is in  
219 line with the biotransformation assays showing no  $\Delta^1$ -KSTD activity in glucose-adapted  
220 cells. As no  $\Delta^{1,4,6}$ -intermediates with a side chain were reported for strain Chol11 during  
221 growth on bile salts (10, 27), this step might occur after side-chain degradation in strain  
222 Chol11.

223 **Oxidation of the 12-OH-group.** The previously observed formation of the 3,12-dioxo-  
224 chol-4,6-dienoate (DOCDA, XIII in Fig 3) (10, 27) suggests the involvement of a 12 $\alpha$ -  
225 dehydrogenase in the degradation of 12-hydroxy bile acids in strain Chol11. A similar

226 reaction is catalyzed in *C. testosteroni* by SteA, which is active on 12 $\alpha$ -hydroxy steroids  
227 without a side chain (38). In *C. testosteroni*, the resulting 12-oxo-steroids are then  
228 reduced to the corresponding 12 $\beta$ -steroids by SteB (Fig 5B) before cleavage of the A-  
229 ring. The presence of a 12 $\beta$ -OH in the degradation intermediate HATD (VIII in Fig 1)  
230 indicates that the reduction to a 12 $\beta$ -OH also takes place in strain Chol11. Homologs to  
231 SteA and SteB are encoded in cluster 1 (Nov2c15 and Nov2c16, respectively) and were  
232 detected with higher Mascot scores in steroid-grown cells (Fig 4).

233

### 234 **Phase 2: Side-chain degradation (green section in Fig 3)**

235 **CoA-activation of the side chain.** The steroid-C24-CoA-ligase SclA catalyzing the  
236 initial step of side chain degradation in strain Chol11 was previously described (29) and  
237 is encoded in the putative side-chain degradation gene cluster 2. SclA abundance,  
238 relative to glucose-grown cells, was 3.3-fold higher in cholate- and deoxycholate-grown  
239 cells, and 1.3-fold higher in 12 $\beta$ -DHADD-grown cells (Fig 4).

240 **Desaturation of the side chain.** Previous enzyme assays with cell free extract of strain  
241 Chol11 indicated that a double bond is introduced into the CoA activated side chain (29).  
242 This reaction is typically catalyzed by  $\alpha_2\beta_2$ -heterotetrameric acyl-CoA dehydrogenases  
243 (ACADs) during the degradation of steroids (39). Two predicted ACAD proteins in gene  
244 cluster 2 (Nov2c221 and Nov2c222) had 4- to 5-fold increased abundances in cholate-  
245 and deoxycholate-grown cells, but not in 12 $\beta$ -DHADD-grown cells (Fig 4). This suggests  
246 that they comprise an ACAD involved in side-chain degradation of bile salts, but the  
247 location of any double bond formed by this ACAD is unknown.

248 **Further side-chain degradation.** The next step in bile-salt side-chain degradation is  
249 typically the addition of water to the double bond (Fig 6B). The enzymes catalyzing this

250 hydration belong to the MaoC family of the thioesterase superfamily, containing a  
251 hotdog fold domain, or the Crotonase family (19, 40–42). These hydratases consist  
252 either of a single protein, such as the C<sub>5</sub> side-chain hydratases of *P. stutzeri* Chol1 and  
253 *M. tuberculosis* (19, 42), or of two subunits, such as the C<sub>3</sub> side-chain hydratase of *M.*  
254 *tuberculosis* (40). Two proteins from the thiolase superfamily with hotdog fold domains  
255 are encoded in cluster 2 (Nov2c219 and Nov2c220) adjacent to the ACAD genes.  
256 Nov2c219 was detected in only cholate- and deoxycholate-grown cells, and Nov2c220,  
257 only in cholate-grown cells (Fig 4). However, these proteins show only very low similarity  
258 (less than 20 % identity) to known side-chain hydratases, which suggests a different  
259 function for these proteins.

260 Homologs to other known side-chain degradation enzymes, such as thiolases and  
261 aldolases, are not encoded in cluster 2 (29). In *P. stutzeri* Chol1 and *R. jostii* RHA1, the  
262 first cycle of side-chain degradation leads to the release of acetyl-CoA and a shortened  
263 C<sub>3</sub>-side chain. For the degradation of the C<sub>3</sub>-side chain, a second cycle of aldolytic  
264 cleavage with similar steps including introduction of a double bond, addition of water and  
265 aldolytic cleavage is necessary. For this second cycle, both organisms encode a second  
266 set of enzymes (13, 19, 23).

267 Our proteome and bioinformatic analyses of strain Chol11 revealed no enzymes that  
268 could potentially be involved in side-chain cleavage or degradation of the C<sub>3</sub>-side chain.  
269 This suggests that side-chain degradation in strain Chol11 is a mechanism other than  
270 aldolytic or thiolytic cleavage. A so-far unknown alternative mechanism might involve  
271 other proteins encoded in cluster 2, including putative hydroxysteroid dehydrogenases,  
272 amidases, and a Rieske monooxygenase (Fig. 6).

273

274 **Phase 3: B-ring cleavage by the monooxygenase KshAB (yellow section in Fig 3)**

275 The first step in the degradation of the steroid nucleus is the cleavage of the B-ring by  
276 the KshAB monooxygenase system (9, 43). Five homologs of the oxygenase  
277 component, KshA, are encoded on chromosome 2 (Nov2c66, Nov2c228, Nov2c407,  
278 Nov2c430, and Nov2c440 with 27 % - 32 % identity to KshA of *P. stutzeri* Chol1) (Fig 4).  
279 The numerous B-ring cleaving KshA homologs in the genome of strain Chol11 strongly  
280 suggest that steroid nucleus degradation starts with 9,10-seco cleavage, although the  
281 resulting 9,10-seco steroids have so far never been detected in cell-free supernatants of  
282 strain Chol11 cultures. Similar multiplicity of KshA homologs is also known from steroid  
283 degrading *Rhodococci* (44, 45). Nov2c228, Nov2c407, Nov2c430, and Nov2c440 had  
284 increased abundances in steroid-grown cells and therefore are candidates for this  
285 reaction. However, Nov2c228 has the lowest similarity to KshA<sub>Chol1</sub>, its encoding gene is  
286 localized in the side-chain degradation gene cluster, and the abundance of Nov2c228  
287 was only increased in bile-salt grown cells, but not in 12 $\beta$ -DHADD-grown cells. Thus, a  
288 different role for this enzyme appears feasible. In this context, the similarities of the  
289 KshA oxygenases and Neverland oxygenases, that are involved in the production of  
290 ecdysteroids in arthropods (46), could indicate a wider function for Rieske  
291 monooxygenases in steroid metabolism.

292 Interestingly, there are no distinct homologs of the reductase component KshB encoded  
293 in the genome of strain Chol11. This was also reported for *N. tardaugens* NBRC16725  
294 (47). A flavodoxin reductase Novbp123 with 29 % identity to KshB of *P. stutzeri* Chol1 is  
295 encoded on plasmid pSb of strain Chol11 (30). This enzyme was detected in the  
296 membrane protein-enriched fractions of all tested cells with similar Mascot scores,  
297 indicating that its synthesis is not regulated in response to steroid degradation.

298 Novbp123 is encoded in a gene cluster together with a ferredoxin, a cytochrome c, and  
299 several exported and membrane proteins, suggesting that it is involved in membrane  
300 electron transport rather than bile-salt degradation specifically (Fig S3). This points at a  
301 different, KshB-independent electron shuttling mechanism for the KshA homologs in  
302 strain Chol11.

303

304 **Phase 4: Complete degradation of the 9,10-*seco* intermediates (orange section in**  
305 **Fig. 3).**

306 Most proteins required for the degradation of the 9,10-*seco* degradation intermediates,  
307 derived from both cholate and deoxycholate, and the respective HIP intermediates (26)  
308 are encoded in gene cluster 3 (Fig 7A). All of these proteins are at least 1.5-fold  
309 increased in abundance in steroid-grown cells (Fig. 4). This confirms that degradation of  
310 the steroid nucleus proceeds via the 9,10-*seco* pathway. Cluster 3 is very similar to the  
311 cluster encoding testosterone degradation in *N. tarda*gens NBRC16725 (47). In both  
312 organisms, genes encoding homologs for the reductase component TesA1 of the 9,10-  
313 *seco* steroid monooxygenase, TesA1A2, are missing, which could be a further hint at a  
314 different electron shuttling mechanism. However, in cluster 3 of strain Chol11, a flavin  
315 reductase (Nov2c347) is encoded near the gene for the oxygenase component, TesA2  
316 (Nov2c349), indicating Nov2c347 could serve as a TesA1 substitute. Regarding HIP-  
317 degradation, a homolog for the gene encoding HIP-CoA-ligase ScdA (48) is missing in  
318 strain Chol11, but the CoA transferase, Nov2c359, could have this function.

319 **Fate of the 12-OH.** In *P. stutzeri* Chol1, the 12 $\beta$ -OH is removed during C- and D-ring  
320 degradation by the elimination of water catalyzed by Hsh1 and subsequent reduction of  
321 the resulting double bond by Sor1 (23) (Fig 5C). In strain Chol11, homologs to Hsh1 and

322 Sor1 are encoded in cluster 1 near *steA* and *steB* (*nov2c12* and *nov2c13*, respectively,  
323 Fig. 5A) and were found in increased abundances in steroid-grown cells (Fig 4). A gene  
324 cluster with the same order of genes for the 12-OH transforming enzymes SteA, SteB,  
325 Hsh1 and Sor1 is present in *N. tardaugens* NBRC16725 and a similar cluster is present  
326 in *C. testosteroni* CNB-2, *P. stutzeri* Chol1, and *Azoarcus* sp. strain Aa7 (Fig 5A),  
327 implicating a general role of these enzymes in bile-salt degradation.

### 328 **Channeling of 7-hydroxy and 7-deoxy bile salts into C- and D- ring degradation.**

329 During degradation of HIP-intermediates (such as VI, XV, and XXII in Fig 7), the  
330 remainder of the B-ring is degraded via  $\beta$ -oxidation, which requires a hydroxy group at  
331 the former C7 (23) (Fig 7B). This hydroxy group is present in 7-hydroxy bile salts such  
332 as cholate, but during the degradation of 7-deoxy bile salts, such as deoxycholate, it has  
333 to be introduced into the propanoate side chain of the respective HIP-intermediates. This  
334 is initiated by the introduction of a double bond by the heteromeric ACAD ScdC1C2  
335 followed by the addition of water by the hydratase ScdD (23, 49, 50).

336 In  $\Delta^{4,6}$ -intermediates, the hydroxy group at C7 is eliminated. Thus, bile salt degradation  
337 by the  $\Delta^{4,6}$ -pathway variant results in HIP-like intermediates with a double bond in the  
338 propanoate side chain attached to ring C (XV). This is the same intermediate as found  
339 during degradation of 7-deoxy bile salts after introduction of a double bond (23), and the  
340 needed hydroxy group could be added by the hydratase, Nov2c364, which was detected  
341 all steroid grown cells in similar abundance (Fig 4). Although the ACAD reaction  
342 catalyzed by ScdC1C2 is not needed for the degradation of cholate via the  $\Delta^{4,6}$ -variant,  
343 both subunits, Nov2c367 and Nov2c361, were found in all steroid-grown cells with  
344 similar Mascot scores (Fig 4). Thus, it is possible that the  $\Delta^6$ -double bond had  
345 meanwhile been reduced, necessitating the ACAD.



346 As the hydroxy group eliminated by Hsh2 must again be added at the stage of HIP  
347 intermediates, the benefit of the elimination remains unclear. It might be related to the  
348 fact that many intermediates of bile-salt degradation are excreted in significant amounts  
349 during growth of bile-salt degrading bacteria not only in laboratory cultures but also in  
350 soil samples (10, 34). Other bile-salt degrading strains, such as *P. stutzeri* Chol1, that  
351 exclusively use the  $\Delta^{1,4}$ -degradation pathway are unable to utilize  $\Delta^{4,6}$ -compounds as  
352 growth substrates (10, 27). To this end, the dehydration might provide a way for strain  
353 Chol11 to secure the individual availability to these important carbon sources in natural  
354 habitats.

355

### 356 **The $\Delta^{4,6}$ -variant is widespread within the family *Sphingomonadaceae***

357 **Prediction of the  $\Delta^{4,6}$ -variant pathway in steroid degrading bacteria.** Apart from  
358 strain Chol11, steroid degradation has been reported in other sphingomonads such as  
359 *N. tardaugens* NBRC16725 (47, 51) and *Sphingomonas* sp. strain KC8 (52). In addition,  
360 *Sphingomonas* sp. strain Chol10 was also isolated as a HOCD A-degrading bacterium  
361 (10).

362 To investigate the prevalence of the  $\Delta^{4,6}$ -variant pathway within the family  
363 *Sphingomonadaceae*, we searched all 398 complete and draft genomes from the  
364 genera *Sphingobium*, *Novosphingobium*, and *Sphingomonas* available from the NCBI  
365 RefSeq database for the simultaneous presence of key steroid degradation proteins and  
366 Hsh2, the key protein of the  $\Delta^{4,6}$ -pathway. First, steroid degrading bacteria were  
367 predicted using 23 Hidden Markov Models (HMMs) representing ten key proteins of  
368 canonical steroid nucleus degradation (53). Based on the presence of seven out of ten  
369 key proteins including KshA and TesB, 53 genomes were predicted to encode steroid

370 degradation. Second, Hsh2 orthologs were determined in these genomes by BLASTp  
371 analyses using Hsh2 of *Sphingobium* sp. strain Chol11 (27) as query. Thirty-nine  
372 genomes containing both, the steroid-degradation genes and *hsh2*, were found. To  
373 further confirm the prediction of these proteins being involved in steroid degradation in  
374 these organisms, a reciprocal BLASTp analysis was performed using steroid  
375 degradation proteins from *P. stutzeri* Chol1 and Hsh2<sub>Chol11</sub> as queries (Fig 8). Thirty-  
376 eight genomes were confirmed to encode Hsh2 orthologs, and all of them contained  
377 orthologs for the majority of key proteins for steroid nucleus degradation. However, only  
378 a small subset of side-chain degradation proteins is encoded in most of the  
379 *Sphingobium* and *Novosphingobium* genomes. This was in contrast to the  
380 *Sphingomonas* genomes where orthologs of the genes encoding CoA-ligase,  
381 heteromeric ACAD, heteromeric hydratase, and aldolase for the degradation of the C<sub>3</sub>-  
382 side chain from *P. stutzeri* Chol1 are present.

383 This suggests that bile-salt degradation via  $\Delta^{4,6}$ -intermediates is widely distributed  
384 among members of *Sphingomonas*, *Sphingobium*, and *Novosphingobium*, while the  
385 distinct side-chain degradation mechanism proposed for strain Chol11 may occur in  
386 most members of *Sphingobium* and *Novosphingobium*.

387 **Bile-salt degradation in strains predicted to use the  $\Delta^{4,6}$ -variant.** To investigate  
388 whether strains predicted to degrade bile salts via the  $\Delta^{4,6}$ -pathway variant, a selection  
389 of type strains with complete genome sequences was analysed for bile salt degradation.  
390 *Novosphingobium aromaticivorans* F199, *Sphingobium herbicidovorans* MH, and *N.*  
391 *tardaugens* NBRC16725 were tested for the degradation of the 7 $\alpha$ -hydroxy bile salts,  
392 cholate and chenodeoxycholate, and the 7-deoxy bile salt, deoxycholate (structures in  
393 Fig 9). Accumulation of  $\Delta^{4,6}$ -intermediates was also monitored.

394 Strains MH, NBRC16725 and F199 grew on all tested bile salts (Fig 9B,D,F), and  
395 transiently accumulated the characteristic  $\Delta^{4,6}$ -intermediates HOCDA (VII in Fig 1) and  
396 DOCDA (XIII in Fig 3) (Fig 9C,E,G,I). In addition, during degradation of the  $7\alpha$ -hydroxy  
397 bile salts, strain F199 formed the intermediates XXIV and XXV that also have a  $\Delta^{4,6}$ -  
398 structure and lack a side chain according to their UV- and mass spectra, respectively  
399 (Fig 9I). This supports our prediction that the  $\Delta^{4,6}$ -variant is the predominant pathway for  
400 bile acid degradation in *Sphingobium*, and *Novosphingobium* strains.

401 Like strain Chol11, strains NBRC16725, MH, and F119 were able to fully metabolize  
402 side-chain bearing bile salts, despite encoding not all sidechain catabolic enzymes  
403 proteins known from other bile salt degrading bacteria. A BLASTp analysis revealed the  
404 presence of gene clusters with high similarity to gene cluster 2 of strain Chol11 in all  
405 three strains (Fig 6A); although the clusters from the *Novosphingobium* strains,  
406 NBRC16725 and F119, were notably missing several genes. In particular, homologs of  
407 the thiolase superfamily proteins Nov2c219 and Nov2c220, the only candidates for side  
408 chain hydratases in strain Chol11, were absent in the genome of NBRC16725.  
409 Homologs of SclA, the putative ACAD Nov2c221/Nov2c222, the Rieske monooxygenase  
410 Nov2c228, and the putative amidases Nov2c227 and Nov2c229 were found in the  
411 predicted side-chain degradation clusters of all three strains.

412

### 413 **Degradation of conjugated bile salts**

414 Strain Chol11 grew on the conjugated bile salts, taurocholate and glycocholate (X and  
415 XI, respectively, in Fig. 3, but not on the free amino acids glycine or taurine (Fig 10B,E).  
416 The inability to grow on these amino acids agrees with the similar biomass yields on  
417 taurocholate and glycocholate versus on unconjugated cholate (27). These results

418 suggests that glycine or taurine are removed by amidases prior to metabolism of the free  
419 bile salts. Two candidate amidases are Nov2c227 and Nov2c229), encoded in the  
420 predicted side-chain degradation gene cluster, were 2.3- to 8.9-fold more abundant in  
421 cholate- and deoxycholate-grown cells.

422 To test their potential role in deconjugation of bile salts, Nov2c227 and Nov2c229, were  
423 each heterologously expressed in *E. coli* MG1655. Cell suspensions and cell-free  
424 extracts of *E. coli* expressing Nov2c227 transformed both taurocholate and glycocholate  
425 to cholate (Fig 10). Cell suspensions and cell-free extracts of *E. coli* expressing the other  
426 amidase candidate, Nov2c229, as well as the empty vector control did not substantially  
427 catalyze this transformation. Additionally, compounds 2 Da lighter than the conjugated  
428 bile salts and cholate were present in almost all assays. *E. coli* possesses a 7 $\alpha$ -hydroxy  
429 steroid dehydrogenase, which catalyzes the oxidation of the 7 $\alpha$ -OH of conjugated and  
430 free bile salts (54). Therefore, it is likely that the additional compounds are the 7-keto-  
431 derivatives of the conjugated bile salts and cholate (XXVI, XXVII, and XXVIII in Fig 10).  
432 Since Nov2c227 cleaves the conjugated bile salts, glycocholate and taurocholate, it was  
433 named **Bile Salt Amidase (Bsa)**.

434 Interestingly, Bsa contains a TAT signal peptide as predicted by SignalP, indicating that  
435 this protein is secreted, and deconjugation of conjugated bile salts takes place in the  
436 periplasmic or extracellular space prior to bile-salt uptake. In contrast to the well-  
437 elucidated N-terminal nucleophile family bile-salt hydrolases from probiotic lactic acid  
438 bacteria such as *Bifidobacterium longum* (55), Nov2c227 belongs to the large family of  
439 amidases. This indicates a different evolutionary origin for bile-salt hydrolases in steroid  
440 degradation as opposed to those in intestinal bacteria, despite their common function.  
441 Homologs of Bsa are encoded in genomes of many strains of the family

442 *Sphingomonadaceae*, e.g. EGO055\_026080 from *N. tardaugens* NBRC16725.  
443 Furthermore, *C. testosteroni* KF-1 was reported to degrade taurocholate (56) and its  
444 genome encodes two Bsa homologs (identity for both 44 %). The respective homologs,  
445 ORF25 and ORF26, from model organism *C. testosteroni* TA441 are encoded in its  
446 steroid degradation mega-cluster (14, 26). The function of Nov2c229 remains unknown  
447 so far.

448

#### 449 **Conclusion and general discussion**

450 Differential proteome analyses of *Sphingobium* sp. strain Chol11 together with  
451 bioinformatic analyses revealed a comprehensive set of candidate proteins for the  
452 complete degradation of bile salts. From these data the complete degradation pathway  
453 for the steroid nucleus could be deduced, which is a mosaic of unknown reactions  
454 (especially side-chain degradation) and reactions known from other steroid-degrading  
455 organisms (Fig 3). Apparently, despite the variation in the first steps of 7-hydroxy bile  
456 salt degradation in strain Chol11, which leads to the introduction of a double bond in the  
457 B-ring by water elimination catalyzed by Hsh2, further degradation of the  $\Delta^{4,6}$ -  
458 intermediates is very similar to the 9,10-*seco* pathway known from other organisms and  
459 steroids. However, the  $\Delta^{4,6}$ -variation produces steroid intermediates that cannot be  
460 utilized by other organisms such as *P. stutzeri* Chol1 (10), suggesting the involvement of  
461 specialized enzymes in organisms that are able to utilize  $\Delta^{4,6}$ -intermediates. The  
462 prediction and identification of further organisms degrading bile salts via this  $\Delta^{4,6}$ -variant  
463 of the 9,10-*seco*-pathway demonstrates a wide distribution of this variant in the family  
464 *Sphingomonadaceae*.

465 In addition, the interpretation of the proteome analyses in conjunction with bioinformatic  
466 analyses resulted in the identification of a side-chain degradation gene cluster encoding  
467 key proteins that are presumably responsible for side chain removal by a yet unknown  
468 mechanism. The bile-salt hydrolase activity of Bsa as well as the CoA-ester formation by  
469 the CoA ligase SclA (29) encoded in this gene cluster further corroborates the  
470 involvement of this cluster in bile salt side-chain degradation. The subsequent  
471 introduction of a double bond into a yet unknown position is presumably catalyzed by the  
472 heteromeric ACAD Nov2c221/222. The absence of several other side-chain degradation  
473 genes from the genomes of strain Chol11, *N. tardaugens* NBRC16725, and *N.*  
474 *aromaticivorans* F199 suggests a mechanism different from thiolytic and aldolytic  
475 cleavage. Interestingly, homologs of SclA, the putative ACAD Nov2c221/Nov2c222, the  
476 Rieske monooxygenase Nov2c228, and the putative amidase Nov2c229 were found in  
477 all Sphingomonads confirmed to use the  $\Delta^{4,6}$ -variant for bile salt degradation. However,  
478 the functions of this Rieske monooxygenase and the putative amidase during bile salt  
479 side-chain degradation remain unclear. In addition to being highly conserved and  
480 encoded near to confirmed side-chain degradation genes in all four tested strains, they  
481 seem to be formed exclusively in response to side-chain containing bile salts in strain  
482 Chol11. Further investigations regarding this gene cluster using molecular methods are  
483 under way. Unfortunately, these analyses are impaired by the complicated genetic  
484 modification of strain Chol11.

485 Interestingly, several members of the family *Sphingomonadaceae* are adapted to growth  
486 with steroids and bile salts. Moreover, both *Sphingobium* sp. strain Chol11 and *N.*  
487 *tardaugens* NBRC16725 grow only slowly with non-steroidal substrates (51) and some  
488 genes for early steps of bile-salt degradation are apparently constitutively induced.

489 Together with the prevalence of bile-salt degradation in strains that had originally been  
490 isolated with xenobiotic compounds (57, 58) indicates that bile-salt degradation may be  
491 a conserved property of these organisms and calls attention to its evolutionary origin.

## 492 **Experimental procedures**

### 493 **Cultivation of bacteria**

494 If not indicated otherwise, *Sphingobium* sp. strain Chol11 (DSM 110934) (10), *S.*  
495 *herbicidovorans* MH (DSM 11019) (58), *N. aromaticivorans* F199 (DSM12444) (59), *N.*  
496 *tardaugens* NBRC16725 (DSM 16702) (51), and *E. coli* MG1655 (DSM 18039) (60)  
497 were cultivated in HEPES-buffered medium B (MB) (61). If not indicated otherwise,  
498 wildtype strains other than *E. coli* were grown with 1 mM cholate as the sole carbon  
499 source, whereas *E. coli* MG1655 was grown with 15 mM glucose. For maintenance,  
500 strain Chol11 and *N. tardaugens* NBRC16725 were grown on MB agar with 1 mM  
501 cholate, *S. herbicidovorans* MH was grown on CASO agar (Merck Millipore, Burlington,  
502 MA, USA), *N. aromaticivorans* F199 was grown on MB agar with 15 mM glucose, and *E.*  
503 *coli* MG1655 was grown on LB agar (62). For cultivation of strains containing  
504 pBBR1MCS-5 (63), 20  $\mu\text{g ml}^{-1}$  gentamicin was added. When bile salts were added,  
505 gentamicin was omitted. Liquid cultures with volumes up to 5 ml were cultivated in 10 ml  
506 test tubes at 200 rpm, larger cultures were cultivated in 500 ml Erlenmeyer flasks  
507 without baffles at 120 rpm. All strains were incubated at 30 °C, except for strain  
508 maintenance of *E. coli* strains (37 °C). For agar plates, 1.5 % (w/v) Bacto agar (BD,  
509 Sparks, USA) was added.

510 Cholate ( $\geq 99$  %), deoxycholate ( $\geq 97$  %), and glycocholate ( $\geq 97$  %) were purchased from  
511 Sigma-Aldrich (St. Louis, MO, USA). Chenodeoxycholate ( $\geq 98$  %) was purchased from  
512 Carl Roth (Karlsruhe, Germany). Taurocholate ( $> 98$  %) was purchased from Fluka  
513 (Buchs, Switzerland).

### 514 **Growth experiments**



515 For growth experiments, 3 – 5 ml main cultures were inoculated to a predefined OD<sub>600</sub>  
516 (about 0.02) directly from liquid starter cultures and growth was determined by  
517 measurement of OD<sub>600</sub> (Camspec M107, Spectronic Camspec, Leeds, UK). Growth with  
518 bile salts was tested using 1 mM cholate, 1 mM chenodeoxycholate or 1 mM  
519 deoxycholate. Growth with conjugated bile salts was tested using 1 mM taurocholate, 1  
520 mM glycocholate, 15 mM glycine or 15 mM taurine. At suitable time points, samples for  
521 HPLC-MS measurements were withdrawn.

522 Starter cultures were grown with 1 mM cholate for strain Chol11, *N. aromaticivorans*  
523 F199, and *N. tardaugens* NBRC16725 or 12 mM succinate for *S. herbicidovorans* MH.  
524 Starter cultures were incubated over-night for about 15 h.

#### 525 **Biotransformation experiments**

526 Induction of cholate degradation in strain Chol11 was tested using suspensions of  
527 cholate- and glucose-grown cells with 1 mM cholate and 10 µg ml<sup>-1</sup> chloramphenicol to  
528 inhibit *de novo* protein synthesis as described (28).

529 For determining whole-cell biotransformation of various steroid compounds by *E. coli*  
530 MG1655 expressing amidase genes, 5 ml starter cultures of *E. coli* MG1655  
531 pBBR1MCS-5 as empty vector control, *E. coli* MG1655 pBBR1MCS-5::*nov2c227* or *E.*  
532 *coli* MG1655 pBBR1MCS-5::*nov2c229* in LB with 20 µg ml<sup>-1</sup> gentamicin were incubated  
533 for about 15 h. Cells were harvested by centrifugation in 2-ml reaction tubes (8,000 x g,  
534 ambient temperature, 3 min), washed with MB and resuspended in MB to an OD<sub>600</sub> of  
535 about 1. Cell suspensions were incubated for several days at 30 °C at 200 rpm after  
536 addition of either 1 mM taurocholate or 1 mM glycocholate. 30 mM glucose were added  
537 to all preparations as carbon source.

538 For monitoring biotransformations of conjugated bile salts by cell free extracts of *E. coli*  
539 MG1655 expressing amidase genes, 50 ml LB with 20  $\mu\text{g ml}^{-1}$  gentamicin were  
540 inoculated to an initial  $\text{OD}_{600}$  of 0.015 with the aforementioned strains of *E. coli* MG1655  
541 and incubated for about 18 h with addition of 0.2 mM isopropyl- $\beta$ -D-thiogalactopyranosid  
542 after about 3 h. Cells were harvested (8,000 x g, 4 °C, 8 min), washed with 10 mM  
543 MOPS buffer (pH 7.8) and resuspended in about 2 ml 50 mM MOPS buffer (pH 7.8).  
544 Cells were disrupted in 15-ml conical centrifugation tubes by ultrasonication on ice  
545 (amplitude 60 %, cycle 0.5, UP200S, Hielscher Ultrasonics, Teltow, Germany) for 8 min  
546 with a 1 min break after 4 min. Cell debris was removed by centrifugation (25,000 x g, 4  
547 °C, 30 min) in 2-ml reaction tubes. Cell extracts were used immediately in enzyme  
548 assays or stored at -20 °C for later use. Enzyme assays (1 ml) contained 50 mM MOPS  
549 (pH 7.8), 1 mM substrate and 100  $\mu\text{l}$  cell extract. Assays were incubated for 30 min – 15  
550 h at 30 °C. Samples of all enzyme assays were subjected to HPLC-MS measurements.

## 551 **Proteome analyses**

552 **Generation of substrate adapted cells.** Strain Chol11 was freshly thawed from a  
553 cryopreservation culture for each cultivation on MB agar and streaked twice onto plates  
554 with 1 mM cholate. After 1 – 4 days, the strain was transferred to new agar plates  
555 containing either 1 mM cholate, 1 mM deoxycholate, 2 mM 12 $\beta$ -DHADD or 15 mM  
556 glucose. Cells were further transferred twice to the same medium after incubation for 2  
557 days with steroidal substrates or 3 – 4 days with glucose. From these plates, twelve 5 ml  
558 MB starter cultures containing the same carbon source as the respective solid media  
559 were inoculated and incubated for about 15 h for steroidal compounds or 30 h for  
560 glucose. Subsequently, 1 mM bile salt, 2 mM 12 $\beta$ -DHADD or 15 mM glucose were  
561 added and the starter cultures were incubated for further 1 – 1.5 h. Starter cultures with

562 the same substrate were pooled and used for inoculation of twelve 100 ml main cultures  
563 in 500-ml Erlenmeyer flasks without baffles containing the same carbon sources at an  
564 OD<sub>600</sub> of 0.015. Main cultures were incubated at 30 °C and 200 rpm and growth was  
565 monitored until the half maximal OD<sub>600</sub> was reached. Cultures were harvested in two 50-  
566 ml conical centrifugation tubes by centrifugation (5,525 x g, 4 °C, 30 min) and kept on  
567 ice. Cells were washed with 25 ml 100 mM Tris buffer (pH 7.5 with HCl) containing 5 mM  
568 MgCl<sub>2</sub> and cells of the same culture were pooled. After centrifugation, cells were  
569 resuspended in 625 µl of the same buffer, transferred to 2 ml reaction tubes and  
570 harvested by centrifugation (14,000 x g, 4 °C, 15 min). After weighing, pellets were  
571 snap-frozen using liquid nitrogen and stored at -70 °C.

572 **Profiling of soluble proteins by 2D DIGE and protein identification by MALDI-TOF-**  
573 **MS/MS.** Soluble proteins were extracted from cells of strain Chol11 and 2D DIGE  
574 performed essentially as described previously (64). Per growth condition, four biological  
575 replicate samples were prepared and 50 µg total protein used for minimal labelling with  
576 200 pmol of Lightning SciDye DIGE fluors (SERVA Electrophoresis GmbH, Heidelberg,  
577 Germany). Glucose-adapted cells served as reference state and were labelled with Sci5.  
578 Protein extracts of the other three (test) states were each labelled with Sci3. The internal  
579 standard contained equal amounts of all test and the reference state(s) and was labelled  
580 with Sci2. First dimension separation by isoelectric focusing (IEF) was conducted with  
581 24 cm-long IPG strips (pH 3–11 NL; GE Healthcare) run in a Protean i12 system (Bio-  
582 Rad, Munich, Germany). The IEF program used was as follows: 50 V for 13 h, 200 V for  
583 1 h, 1,000 V for 1 h, gradual gradient to 10,000 V within 2 h and 10,000 V until 80,000  
584 Vhs were reached. Second dimension separation according to molecular size was done  
585 by SDS-PAGE (12.5% gels, v/v) using an EttanDalttwelve system (GE Healthcare).

586 Directly after electrophoresis, 2D DIGE gels were digitalized using a CCD camera  
587 system (Intas Advanced 2D Imager; Intas Science Imaging Instruments GmbH,  
588 Göttingen, Germany) (65). Cropped gel images were analyzed with the SameSpots™  
589 software (version 5.0.5.0, TotalLab, Newcastle upon Tyne, UK) and spots with changes  
590 in abundance of  $\geq$  [1.5]-fold and an ANOVA p-value of  $\leq 1 \times 10^{-4}$  were accepted as  
591 significant (66). Spots of interest were excised from at least two separate, preparative  
592 colloidal Coomassie Brilliant Blue stained gels (300  $\mu$ g protein load) using the EXQuest  
593 spot cutter (Bio-Rad), and subsequently washed and tryptically digested as described  
594 recently (67).

595 Sample digests were spotted onto Anchorchip steel targets (Bruker Daltonik GmbH,  
596 Bremen, Germany) and analyzed with an UltrafleXtreme MALDI-TOF/TOF mass  
597 spectrometer (Bruker Daltonik GmbH) as recently described (67). Peptide mass  
598 fingerprint (PMF) searches were performed with a Mascot server (version 2.3; Matrix  
599 Science, London, UK) against the translated genome of strain Chol11 with a mass  
600 tolerance of 25 ppm. Five lift spectra were collected to confirm PMF identification and  
601 three additional spectra were acquired of unassigned peaks applying feedback by the  
602 ProteinScope platform (version 3.1; Bruker Daltonik GmbH). In case of failed PMF  
603 identification, eight lift spectra of suitable precursors were acquired. MS/MS searches  
604 were performed with a mass tolerance of 100 ppm. For both, MS and MS/MS searches,  
605 Mascot scores not meeting the 95% certainty criterion were not considered significant. A  
606 single miscleavage was allowed (enzyme trypsin) and carbamidomethyl (C) and  
607 oxidation (M) were set as fixed and variable modifications, respectively.

608 **Shotgun proteomic analysis.** For shotgun analysis, cell pellets of three biological  
609 replicate samples per growth condition were suspended in lysis buffer, cells disrupted

610 and the debris-free fraction reduced, alkylated and subjected to tryptic digest as  
611 previously described (67). Obtained peptides were separated by nanoLC (UltiMate 3000;  
612 ThermoFisher Scientific, Germering, Germany) using a trap-column (C18, 5  $\mu\text{m}$  bead  
613 size, 2 cm length, 75  $\mu\text{m}$  inner diameter; ThermoFisher Scientific) and a 25 cm analytical  
614 column (C18, 2  $\mu\text{m}$  bead size, 75  $\mu\text{m}$  inner diameter; ThermoFisher Scientific) applying  
615 a 360 min linear gradient (68). The nanoLC eluent was continuously analyzed by an  
616 online-coupled ion-trap mass spectrometer (amaZon speed ETD; Bruker Daltonik  
617 GmbH) using the captive spray electrospray ion source (Bruker Daltonik GmbH). The  
618 instrument was operated in positive mode with a capillary current of 1.3 kV and drygas  
619 flow of 3 l min<sup>-1</sup> at 150°C. Active precursor exclusion was set for 0.2 min. Per full scan  
620 MS, 20 MS/MS spectra of the most intense masses were acquired. Protein identification  
621 was performed with ProteinScape as described above, including a mass tolerance of 0.3  
622 Da for MS and 0.4 Da for MS/MS searches and applying a target decoy strategy (false  
623 discovery rate < 1%).

624 **Analysis of the membrane protein-enriched fraction.** Total membrane fractions were  
625 prepared from two biological replicates per substrate condition as described (67). The  
626 obtained protein content was determined with the RC-DC assay (Bio-Rad) and 8  $\mu\text{g}$  total  
627 protein separated by SDS-PAGE gels (~7 cm separation gel). Following staining with  
628 Coomassie Brilliant Blue (69), each sample lane was cut into 8 slices and each slice into  
629 small pieces of ~1-2 mm<sup>3</sup> prior to washing, reduction, alkylation and tryptic digest (67).  
630 Separation and mass determination was performed as described above, using a 100  
631 min linear gradient. Identified proteins (performed as described above) of each slice per  
632 sample were compiled using the protein extractor of the ProteinScape platform.

633 **Cloning techniques**

634 Cloning was performed according to standard procedures and as described elsewhere  
635 (27).

636 For expression of amidase genes in *E. coli* MG1655, genes were amplified using the  
637 respective primer pairs expfor/exprev (Tab 1) and ligated into vector pBBR1MCS-5. The  
638 respective ligation products were transferred to *E. coli* MG1655 by heat shock  
639 transformation. Presence and correct ligation of plasmids was confirmed by colony PCR  
640 using M13 primers.

#### 641 **Analytical methods**

642 Steroid compounds were analyzed by HPLC-MS. For this, samples were centrifuged  
643 (>16,000 x g, ambient temperature, 5 min) to remove cells and particles. Supernatants  
644 were stored at -20 °C and centrifuged again prior to measurement. Samples from cell  
645 suspension experiments with *E. coli* MG1655 were directly frozen at -20 °C and only  
646 centrifuged after thawing to break the cells. HPLC-MS measurements were performed  
647 with a Dionex Ultimate 3000 HPLC (ThermoFisher Scientific, Waltham, MA, USA) with  
648 an UV/visible light diode array detector and coupled to an ion trap amaZon speed mass  
649 spectrometer (Bruker Daltonik, Bremen, Germany) with an electrospray ion source.  
650 Compounds were separated over a reversed phase C<sub>18</sub> column (150 x 3 mm,  
651 Eurosphere II, 100-5 C<sub>18</sub>; Knauer Wissenschaftliche Geräte, Berlin, Germany) at 25 °C.  
652 Samples of cell suspensions for testing the induction of steroid degradation in  
653 *Sphingobium* sp. strain Chol11 were measured as described by (27), whereas all other  
654 samples were measured as described by (28).

655 Bile salt concentrations were determined as peak area from base peak chromatograms  
656 measured in negative ion mode. Intermediates were identified according to retention  
657 time, UV- and MS-spectra, and comparison with known compounds. Structures of

658 unknown metabolites were proposed on the basis of retention time as well as UV- and  
659 MS-spectra.

## 660 **Bioinformatic methods**

661 Searches for homologous proteins and determinations of protein similarities were  
662 performed using the BLASTp algorithm (70, 71). Protein similarities were calculated from  
663 global alignments in the BLAST suite using the Needleman-Wunsch algorithm (70, 72)  
664 Protein domains and families were predicted using Interpro (73). For functional  
665 annotation of strain Chol11, the eggNOG database (74) was used.

666 For the bioinformatic identification of other sphingomonads using the  $\Delta^{4,6}$ -variant of the  
667 9,10-*seco*-pathway, first a database of putative steroid degraders was set up similar to  
668 (75). On 18 October 2018, all complete and draft genomes available for the genera  
669 *Sphingobium*, *Novosphingobium*, and *Sphingomonas* were downloaded from the  
670 RefSeq database (version 89). Using 23 Hidden Markov Models (HMMs) (53), these  
671 genomes were searched for ten homologs of steroid degradation proteins using HMMER  
672 v3 (76) using a maximum *E*-value of  $10^{-25}$ . HMMs for  $\Delta^1$ -KSTD (KstD), KshA, TesA2  
673 (=HsaA in *R. jostii* RHA1), TesB (=HsaC), TesE (=HsaE), TesF (=HsaG), TesG (=HsaF),  
674 ScdK (=IpdC), ScdL1 (=IpdA), and ScdL2 (=IpdB) were used. Bacteria were predicted  
675 to be able to degrade steroids when their genomes encoded homologs of seven out of  
676 the eleven steroid degradation key enzymes including KshA and TesA2. With these  
677 genomes, a reciprocal BLASTp search (75) was conducted using the key enzyme of the  
678  $\Delta^{4,6}$ -pathway variant Hsh2 from strain Chol11 (27) as query using *E*-value and identity  
679 cutoffs of  $10^{-25}$  and 35 %, respectively. These values were optimized empirically  
680 comparing analyses using Hsh2<sub>Chol11</sub> as well as BaiE from *C. scindens* (UniProt-ID  
681 P19412) which has a similar function in a different pathway (77). The results of both

682 analyses were compared and *E*-value and identity cutoffs were chosen to ensure, that  
683 proteins were only identified as homologs of one of these dehydratases. All genomes  
684 from putative steroid degraders containing Hsh2 homologs were subjected to a  
685 reciprocal BLASTp analysis using known steroid degradation proteins from *P. stutzeri*  
686 Chol1 as queries. For data analysis and preparation of figures, R (v3.5.1) was used  
687 together with the packages circlize (v0.4.8), genoPlotR (v0.8.9), ggplot2 (v3.2.1),  
688 ComplexHeatmap (v1.18.1), gplots (v3.0.3), RColorBrewer (v1.1-2), VennDiagram  
689 (v1.6.20), ape (v5.3), reshape2 (v1.4.3), tidyverse (v1.3.0), and readxl (v1.3.1).



690 **Acknowledgements**

691 The authors thank Karin Niermann and Kirsten Heuer (both Münster) as well as  
692 Christina Hinrichs (Oldenburg) for excellent experimental support and Florentin Schmidt  
693 for help with planning of cloning.

694 This work was funded by two grants of the Deutsche Forschungsgemeinschaft (DFG  
695 projects PH71/3-2 and INST 211/646-1 FUGG) to BP and a scholarship of the DAAD  
696 Stiftung in cooperation with the Prof. Dr. Bingel-Stiftung to FF.

697 **References**

- 698 1. Maldonado-Valderrama J, Wilde P, Maclerzanka A, MacKie A. 2011. The role of  
699 bile salts in digestion. *Adv Colloid Interface Sci* 165:36–46.
- 700 2. Hylemon PB, Zhou H, Pandak WM, Ren S, Gil G, Dent P. 2009. Bile acids as  
701 regulatory molecules. *J Lipid Res* 50:1509–1520.
- 702 3. Jones B V., Begley M, Hill C, Gahan CGM, Marchesi JR. 2008. Functional and  
703 comparative metagenomic analysis of bile salt hydrolase activity in the human gut  
704 microbiome. *Proc Natl Acad Sci USA* 105:13580–13585.
- 705 4. Hofmann AF, Hagey LR, Krasowski MD. 2010. Bile salts of vertebrates: structural  
706 variation and possible evolutionary significance. *J Lipid Res* 51:226–46.
- 707 5. Russell DW. 2003. The enzymes, regulation, and genetics of bile acid synthesis.  
708 *Annu Rev Biochem* 72:137–174.
- 709 6. Ridlon JM, Kang D-JJ, Hylemon PB. 2006. Bile salt biotransformations by human  
710 intestinal bacteria. *J Lipid Res* 47:241–259.
- 711 7. Philipp B. 2011. Bacterial degradation of bile salts. *Appl Microbiol Biotechnol*  
712 89:903–915.
- 713 8. Olivera ER, Luengo JM. 2019. Steroids as environmental compounds recalcitrant  
714 to degradation: genetic mechanisms of bacterial biodegradation pathways. *Genes*  
715 (Basel) 10:512.
- 716 9. Philipp B, Erdbrink H, Suter MJF, Schink B. 2006. Degradation of and sensitivity to  
717 cholate in *Pseudomonas* sp. strain Chol1. *Arch Microbiol* 185:192–201.
- 718 10. Holert J, Yücel O, Suvėkbala V, Kulić Ž, Möller H, Philipp B. 2014. Evidence of  
719 distinct pathways for bacterial degradation of the steroid compound cholate  
720 suggests the potential for metabolic interactions by interspecies cross-feeding.

- 721 Environ Microbiol 16:1424–1440.
- 722 11. Merino E, Barrientos A, Rodríguez J, Naharro G, Luengo JM, Olivera ER. 2013.  
723 Isolation of cholesterol- and deoxycholate-degrading bacteria from soil samples:  
724 evidence of a common pathway. Appl Microbiol Biotechnol 97:891–904.
- 725 12. Yücel O, Borgert SR, Poehlein A, Niermann K, Philipp B. 2018. The 7 $\alpha$ -  
726 hydroxysteroid dehydratase Hsh2 is essential for anaerobic degradation of the  
727 steroid skeleton of 7 $\alpha$ -hydroxyl bile salts in the novel denitrifying bacterium  
728 *Azoarcus* sp. strain Aa7. Environ Microbiol 21:800–813.
- 729 13. Mohn WW, Wilbrink MH, Casabon I, Stewart GR, Liu J, van der Geize R, Eltis LD.  
730 2012. Gene cluster encoding cholate catabolism in *Rhodococcus* spp. J Bacteriol  
731 194:6712–6719.
- 732 14. Horinouchi M, Hayashi T, Kudo T. 2012. Steroid degradation in *Comamonas*  
733 *testosteroni*. J Steroid Biochem Mol Biol 129:4–14.
- 734 15. Wipperman MF, Sampson NS, Thomas ST, T. Thomas S. 2014. Pathogen roid  
735 rage: cholesterol utilization by *Mycobacterium tuberculosis*. Crit Rev Biochem Mol  
736 Biol 49:269–93.
- 737 16. Birkenmaier A, Holert J, Erdbrink H, Möller HM, Friemel A, Schönenberger R,  
738 Suter MJF, Klebensberger J, Philipp B. 2007. Biochemical and genetic  
739 investigation of initial reactions in aerobic degradation of the bile acid cholate in  
740 *Pseudomonas* sp. strain Chol1. J Bacteriol 189:7165–7173.
- 741 17. Swain K, Casabon I, Eltis LD, Mohn WW. 2012. Two transporters essential for  
742 reassimilation of novel cholate metabolites by *Rhodococcus jostii* RHA1. J  
743 Bacteriol 194:6720–6727.
- 744 18. Capyk JK, Casabon I, Gruninger R, Strynadka NC, Eltis LD. 2011. Activity of 3-

- 745 ketosteroid 9 $\alpha$ -hydroxylase (KshAB) indicates cholesterol side chain and ring  
746 degradation occur simultaneously in *Mycobacterium tuberculosis*. J Biol Chem  
747 286:40717–40724.
- 748 19. Holert J, Jagmann N, Philipp B. 2013. The essential function of genes for a  
749 hydratase and an aldehyde dehydrogenase for growth of *Pseudomonas* sp. strain  
750 Chol1 with the steroid compound cholate indicates an aldolytic reaction step for  
751 deacetylation of the side chain. J Bacteriol 195:3371–3380.
- 752 20. Szentirmai A. 1990. Microbial physiology of sidechain degradation of sterols. J Ind  
753 Microbiol 6:101–115.
- 754 21. Holert J, Kulić Ž, Yücel O, Suvekbala V, Suter MJF, Möller HM, Philipp B. 2013.  
755 Degradation of the acyl side chain of the steroid compound cholate in  
756 *Pseudomonas* sp. strain Chol1 proceeds via an aldehyde intermediate. J Bacteriol  
757 195:585–595.
- 758 22. Birkenmaier A, Möller HM, Philipp B. 2011. Identification of a thiolase gene  
759 essential for  $\beta$ -oxidation of the acyl side chain of the steroid compound cholate in  
760 *Pseudomonas* sp. strain Chol1. FEMS Microbiol Lett 318:123–130.
- 761 23. Holert J, Yücel O, Jagmann N, Prestel A, Möller HM, Philipp B. 2016. Identification  
762 of bypass reactions leading to the formation of one central steroid degradation  
763 intermediate in metabolism of different bile salts in *Pseudomonas* sp. strain Chol1.  
764 Environ Microbiol 18:3373–3389.
- 765 24. Barrientos Á, Merino E, Casabon I, Rodríguez J, Crowe AM, Holert J, Philipp B,  
766 Eltis LD, Olivera ER, Luengo JM. 2015. Functional analyses of three acyl-CoA  
767 synthetases involved in bile acid degradation in *Pseudomonas putida* DOC21.  
768 Environ Microbiol 17:47–63.

- 769 25. Crowe AM, Casabon II, Brown KL, Liu J, Lian J, Rogalski JC, Hurst TE, Snieckus  
770 V, Foster LJ, Eltis LD. 2017. Catabolism of the last two steroid rings in  
771 *Mycobacterium tuberculosis* and other bacteria. *MBio* 8:1–16.
- 772 26. Horinouchi M, Koshino H, Malon M, Hirota H, Hayashi T. 2019. Steroid  
773 degradation in *Comamonas testosteroni* TA441: identification of the entire  $\beta$ -  
774 oxidation cycle of the cleaved B ring. *Appl Environ Microbiol* 85:1–17.
- 775 27. Yücel O, Drees S, Jagmann N, Patschkowski T, Philipp B. 2016. An unexplored  
776 pathway for degradation of cholate requires a  $7\alpha$ -hydroxysteroid dehydratase and  
777 contributes to a broad metabolic repertoire for the utilization of bile salts in  
778 *Novosphingobium* sp. strain Chol11. *Environ Microbiol* 18:5187–5203.
- 779 28. Feller FM, Marke G, Drees SL, Wöhlbrand L, Rabus R, Philipp B. 2021. Substrate  
780 inhibition of  $5\beta$ - $\Delta^4$ -3-ketosteroid dehydrogenase in *Sphingobium* sp. strain Chol11  
781 acts as circuit breaker during growth with toxic bile salts. *Front Microbiol*  
782 12:655312.
- 783 29. Yücel O, Holert J, Ludwig KC, Thierbach S, Philipp B. 2018. A novel  
784 steroidcoenzyme A ligase from *Novosphingobium* sp. strain Chol11 is essential for  
785 an alternative degradation pathway for bile salts. *Appl Environ Microbiol* 84:1–16.
- 786 30. Yücel O, Wibberg D, Philipp B, Kalinowski J. 2018. Genome sequence of the bile  
787 salt-degrading bacterium *Novosphingobium* sp. strain Chol11, a model organism  
788 for bacterial steroid catabolism. *Genome Announc* 6:e01372–17.
- 789 31. Noinaj N, Guillier M, Barnard TJ, Buchanan SK. 2010. TonB-dependent  
790 transporters: regulation, structure, and function. *Annu Rev Microbiol* 64:43–60.
- 791 32. Fujita M, Mori K, Hara H, Hishiyama S, Kamimura N, Masai E. 2019. A TonB-  
792 dependent receptor constitutes the outer membrane transport system for a lignin-

- 793 derived aromatic compound. *Commun Biol* 2:1–10.
- 794 33. Ibero J, Galán B, Rivero-Buceta V, García JL. 2020. Unraveling the 17 $\beta$ -estradiol  
795 degradation pathway in *Novosphingobium tardaugens* NBRC 16725. *Front*  
796 *Microbiol* 11:588300.
- 797 34. Mendelski MN, Dölling R, Feller FM, Hoffmann D, Ramos Fangmeier L, Ludwig  
798 KC, Yücel O, Mährlein A, Paul RJ, Philipp B. 2019. Steroids originating from  
799 bacterial bile acid degradation affect *Caenorhabditis elegans* and indicate potential  
800 risks for the fauna of manured soils. *Sci Rep* 9:11120.
- 801 35. Oppermann UCT, Maser E. 1996. Characterization of a 3 $\alpha$ -hydroxysteroid  
802 dehydrogenase/carbonyl reductase from the Gram-negative bacterium  
803 *Comamonas testosteroni*. *Eur J Biochem* 241:744–749.
- 804 36. Horinouchi M, Kurita T, Yamamoto T, Hatori E, Hayashi T, Kudo T, Hirosawa W-S.  
805 2004. Steroid degradation gene cluster of *Comamonas testosteroni* consisting of  
806 18 putative genes from *meta*-cleavage enzyme gene *tesB* to regulator gene *tesR*.  
807 *Biochem Biophys Res Commun* 324:597–604.
- 808 37. Knol J, Bodewits K, Hessels GI, Dijkhuizen L, van der Geize R. 2008. 3-Keto-5 $\alpha$ -  
809 steroid  $\Delta^1$ -dehydrogenase from *Rhodococcus erythropolis* SQ1 and its orthologue  
810 in *Mycobacterium tuberculosis* H37Rv are highly specific enzymes that function in  
811 cholesterol catabolism. *Biochem J* 410:339–346.
- 812 38. Horinouchi M, Hayashi T, Koshino H, Malon M, Yamamoto T, Kudo T. 2008.  
813 Identification of genes involved in inversion of stereochemistry of a C-12 hydroxyl  
814 group in the catabolism of cholic acid by *Comamonas testosteroni* TA441. *J*  
815 *Bacteriol* 190:5545–5554.
- 816 39. Thomas ST, Sampson NS. 2013. *Mycobacterium tuberculosis* utilizes a unique

- 817 heterotetrameric structure for dehydrogenation of the cholesterol side chain.  
818 Biochemistry 52:2895–2904.
- 819 40. Yang M, Guja KE, Thomas ST, Garcia-Diaz M, Sampson NS. 2014. A distinct  
820 MaoC-like enoyl-CoA hydratase architecture mediates cholesterol catabolism in  
821 *Mycobacterium tuberculosis*. ACS Chem Biol 9:2632–2645.
- 822 41. Yuan T, Werman JM, Yin X, Yang M, Garcia-Diaz M, Sampson NS. 2021.  
823 Enzymatic  $\beta$ -oxidation of the cholesterol side chain in *Mycobacterium tuberculosis*  
824 bifurcates stereospecifically at hydration of 3-oxo-cholest-4,22-dien-24-oyl-CoA.  
825 ACS Infect Dis acsinfecdis.1c00069.
- 826 42. Bonds AC, Yuan T, Werman JM, Jang J, Lu R, Nesbitt NM, Garcia-Diaz M,  
827 Sampson NS. 2020. Post-translational succinylation of *Mycobacterium*  
828 *tuberculosis* enoyl-CoA hydratase EchA19 slows catalytic hydration of cholesterol  
829 catabolite 3-oxo-chol-4,22-diene-24-oyl-CoA. ACS Infect Dis 6:2214–2224.
- 830 43. Petrusma M, Van Der Geize R, Dijkhuizen L. 2014. 3-Ketosteroid 9 $\alpha$ -hydroxylase  
831 enzymes: Rieske non-heme monooxygenases essential for bacterial steroid  
832 degradation. Antonie Van Leeuwenhoek 106:157–172.
- 833 44. Petrusma M, Hessels G, Dijkhuizen L, van der Geize R. 2011. Multiplicity of 3-  
834 ketosteroid-9 $\alpha$ -hydroxylase enzymes in *Rhodococcus rhodochrous* DSM43269 for  
835 specific degradation of different classes of steroids. J Bacteriol 193:3931–3940.
- 836 45. Penfield JS, Worrall LJ, Strynadka NC, Eltis LD. 2014. Substrate specificities and  
837 conformational flexibility of 3-ketosteroid 9 $\alpha$ -hydroxylases. J Biol Chem  
838 289:25523–25536.
- 839 46. Yoshiyama-Yanagawa T, Enya S, Shimada-Niwa Y, Yaguchi S, Haramoto Y,  
840 Matsuya T, Shiomi K, Sasakura Y, Takahashi S, Asashima M, Kataoka H, Niwa R.

- 841 2011. The conserved Rieske oxygenase DAF-36/Neverland is a novel cholesterol-  
842 metabolizing enzyme. *J Biol Chem* 286:25756–25762.
- 843 47. Ibero J, Galán B, Díaz E, García JL. 2019. Testosterone degradative pathway of  
844 *Novosphingobium tardaugens*. *Genes (Basel)* 10:871.
- 845 48. Horinouchi M, Hayashi T, Koshino H, Kudo T. 2006. ORF18-disrupted mutant of  
846 *Comamonas testosteroni* TA441 accumulates significant amounts of 9,17-dioxo-  
847 1,2,3,4,10,19-hexanorandrostan-5-oic acid and its derivatives after incubation with  
848 steroids. *J Steroid Biochem Mol Biol* 101:78–84.
- 849 49. Horinouchi M, Hayashi T, Koshino H, Malon M, Hirota H, Kudo T. 2014.  
850 Identification of 9 $\alpha$ -hydroxy-17-oxo-1,2,3,4,10,19-hexanorandrostan- 5-oic acid in  
851 steroid degradation by *Comamonas testosteroni* TA441 and its conversion to the  
852 corresponding 6-en-5-oyl coenzyme A (CoA) involving open reading frame 28  
853 (ORF28)- and ORF30-encoded acyl-CoA dehydrogenases. *J Bacteriol* 196:3598–  
854 3608.
- 855 50. Horinouchi M, Hayashi T, Koshino H, Malon M, Hirota H, Kudo T. 2014.  
856 Identification of 9 $\alpha$ -hydroxy-17-oxo-1,2,3,4,10,19-hexanorandrost-6- en-5-oic acid  
857 and  $\beta$ -oxidation products of the C-17 side chain in cholic acid degradation by  
858 *Comamonas testosteroni* TA441. *J Steroid Biochem Mol Biol* 143:306–322.
- 859 51. Fujii K, Satomi M, Morita N, Motomura T, Tanaka T, Kikuchi S. 2003.  
860 *Novosphingobium tardaugens* sp. nov., an oestradiol-degrading bacterium isolated  
861 from activated sludge of a sewage treatment plant in Tokyo. *Int J Syst Evol*  
862 *Microbiol* 53:47–52.
- 863 52. Roh H, Chu KH. 2010. A 17 $\beta$ -estradiol-utilizing bacterium, *Sphingomonas* strain  
864 KC8: part i - characterization and abundance in wastewater treatment plants.



- 865 Environ Sci Technol 44:4943–4950.
- 866 53. Holert J, Cardenas E, Bergstrand LH, Zaikova E, Hahn AS, Hallam SJ, Mohn WW.  
867 2018. Metagenomes reveal global distribution of bacterial steroid catabolism in  
868 natural, engineered, and host environments. MBio 9:e02345–17.
- 869 54. Yoshimoto T, Higashi H, Kanatani A, Sheng Lin XU, Nagai H, Oyama H, Kurazono  
870 K, Tsuru D. 1991. Cloning and sequencing of the 7 $\alpha$ -hydroxysteroid  
871 dehydrogenase gene from *Escherichia coli* HB101 and characterization of the  
872 expressed enzyme. J Bacteriol 173:2173–2179.
- 873 55. Foley MH, O’Flaherty S, Barrangou R, Theriot CM. 2019. Bile salt hydrolases:  
874 gatekeepers of bile acid metabolism and host-microbiome crosstalk in the  
875 gastrointestinal tract. PLOS Pathog 15:e1007581.
- 876 56. Rösch V, Denger K, Schleheck D, Smits THM, Cook AM. 2008. Different bacterial  
877 strategies to degrade taurocholate. Arch Microbiol 190:11–18.
- 878 57. Balkwill DL, Drake GR, Reeves RH, Fredrickson JK, White DC, Ringelberg DB,  
879 Chandler DP, Romine MF, Kennedy DW, Spadoni CM. 1997. Taxonomic study of  
880 aromatic-degrading bacteria from deep-terrestrial- subsurface sediments and  
881 description of *Sphingomonas aromaticivorans* sp. nov., *Sphingomonas*  
882 *subterranea* sp. nov., and *Sphingomonas stygia* sp. nov. Int J Syst Bacteriol  
883 47:191–201.
- 884 58. Zipper C, Nickel K, Angst W, Kohler H-PE. 1996. Complete microbial degradation  
885 of both enantiomers of the chiral herbicide mecoprop [(RS)-2-(4-chloro-2-  
886 methylphenoxy)propionic acid] in an enantioselective manner by *Sphingomonas*  
887 *herbicidovorans* sp. nov. Appl Environ Microbiol 62:4318–4322.
- 888 59. Fredrickson JK, Brockman FJ, Workman DJ, Li SW, Stevens TO. 1991. Isolation

- 889 and characterization of a subsurface bacterium capable of growth on toluene,  
890 naphthalene, and other aromatic compounds. *Appl Environ Microbiol* 57:796–803.
- 891 60. Blattner FR, Plunkett G, Bloch CA, Perna NT, Burland V, Riley M, Collado-Vides J,  
892 Glasner JD, Rode CK, Mayhew GF, Gregor J, Davis NW, Kirkpatrick HA, Goeden  
893 MA, Rose DJ, Mau B, Shao Y. 1997. The complete genome sequence of  
894 *Escherichia coli* K-12. *Science* 277:1453–1462.
- 895 61. Jagmann N, Brachvogel H-P, Philipp B. 2010. Parasitic growth of *Pseudomonas*  
896 *aeruginosa* in co-culture with the chitinolytic bacterium *Aeromonas hydrophila*.  
897 *Environ Microbiol* 12:1787–1802.
- 898 62. Bertani G. 1951. Studies on lysogenesis. I. The mode of phage liberation by  
899 lysogenic *Escherichia coli*. *J Bacteriol* 62:293–300.
- 900 63. Kovach ME, Elzer PH, Steven Hill D, Robertson GT, Farris MA, Roop RM,  
901 Peterson KM, Elzer A' PH, Steven Hill D, Robertson GT, Farris MA, Martin R, li R,  
902 Peterson KM, Peterson KM. 1995. Four new derivatives of the broad-host-range  
903 cloning vector pBBR1MCS, carrying different antibiotic-resistance cassettes. *Gene*  
904 166:175–176.
- 905 64. Gade D, Thiermann J, Markowsky D, Rabus R. 2003. Evaluation of two-  
906 dimensional difference gel electrophoresis for protein profiling. *J Mol Microbiol*  
907 *Biotechnol* 5:240–251.
- 908 65. Strijkstra A, Trautwein K, Roesler S, Feenders C, Danzer D, Riemenschneider U,  
909 Blasius B, Rabus R. 2016. High performance CCD camera system for  
910 digitalisation of 2D DIGE gels. *Proteomics* 16:1975–1979.
- 911 66. Schnaars V, Dörries M, Hutchins M, Wöhlbrand L, Rabus R. 2018. What's the  
912 Difference? 2D DIGE Image Analysis by DeCyder™ versus SameSpots™. *J Mol*

- 913 Microbiol Biotechnol 28:128–136.
- 914 67. Koßmehl S, Wöhlbrand L, Drüppel K, Feenders C, Blasius B, Rabus R. 2013.  
915 Subcellular protein localization (cell envelope) in *Phaeobacter inhibens* DSM  
916 17395. Proteomics 13:2743–2760.
- 917 68. Wöhlbrand L, Rabus R, Blasius B, Feenders C. 2017. Influence of NanoLC  
918 column and gradient length as well as MS/MS frequency and sample complexity  
919 on shotgun protein identification of marine bacteria. J Mol Microbiol Biotechnol  
920 27:199–212.
- 921 69. Neuhoff V, Arold N, Taube D, Ehrhardt W. 1988. Improved staining of proteins in  
922 polyacrylamide gels including isoelectric focusing gels with clear background at  
923 nanogram sensitivity using Coomassie Brilliant Blue G-250 and R-250.  
924 Electrophoresis 9:255–262.
- 925 70. Johnson M, Zaretskaya I, Raytselis Y, Merezhuk Y, McGinnis S, Madden TL.  
926 2008. NCBI BLAST: a better web interface. Nucleic Acids Res 36:W5–9.
- 927 71. Altschul SF, W G, W M, Myers EW, J LD. 1990. Basic local alignment search tool.  
928 J Mol Biol 215:403–410.
- 929 72. Needleman SB, Wunsch CD. 1970. A general method applicable to the search for  
930 similarities in the amino acid sequence of two proteins. J Mol Biol 48:443–453.
- 931 73. Mitchell AL, Attwood TK, Babbitt PC, Blum M, Bork P, Bridge A, Brown SD, Chang  
932 HY, El-Gebali S, Fraser MI, Gough J, Haft DR, Huang H, Letunic I, Lopez R,  
933 Luciani A, Madeira F, Marchler-Bauer A, Mi H, Natale DA, Necci M, Nuka G,  
934 Orengo C, Pandurangan AP, Paysan-Lafosse T, Pesseat S, Potter SC, Qureshi  
935 MA, Rawlings ND, Redaschi N, Richardson LJ, Rivoire C, Salazar GA, Sangrador-  
936 Vegas A, Sigrist CJA, Sillitoe I, Sutton GG, Thanki N, Thomas PD, Tosatto SCE,

- 937 Yong SY, Finn RD. 2019. InterPro in 2019: improving coverage, classification and  
938 access to protein sequence annotations. *Nucleic Acids Res* 47:D351–D360.
- 939 74. Huerta-Cepas J, Szklarczyk D, Heller D, Hernández-Plaza A, Forslund SK, Cook  
940 H, Mende DR, Letunic I, Rattei T, Jensen LJ, Von Mering C, Bork P. 2019.  
941 EggNOG 5.0: A hierarchical, functionally and phylogenetically annotated orthology  
942 resource based on 5090 organisms and 2502 viruses. *Nucleic Acids Res*  
943 47:D309–D314.
- 944 75. Bergstrand LH, Cardenas E, Holert J, van Hamme JD, Mohn WW. 2016.  
945 Delineation of steroid-degrading microorganisms through comparative genomic  
946 analysis. *MBio* 7:1–14.
- 947 76. Eddy SR. 2011. Accelerated Profile HMM Searches. *PLoS Comput Biol*  
948 7:e1002195.
- 949 77. Wells JE, Hylemon PB. 2000. Identification and characterization of a bile acid 7 $\alpha$ -  
950 dehydroxylation operon in *Clostridium* sp. strain TO-931, a highly active 7 $\alpha$ -  
951 dehydroxylating strain isolated from human feces. *Appl Environ Microbiol*  
952 66:1107–1113.
- 953

954 **Legends to the Figures**

955 **Fig 1.** Section of cholate degradation via the  $\Delta^{1,4}$ - and  $\Delta^{4,6}$ -variants of the 9,10-*seco*-  
956 pathway. Solid lines: known reactions, dotted lines: predicted reactions. Blue: A-ring  
957 oxidation and 7-OH elimination (phase 1), green: side-chain degradation (phase 2),  
958 yellow: B-ring cleavage (phase 3), orange: degradation of the 9,10-*seco*-steroid (phase  
959 4). Compound abbreviations: IV, 12 $\beta$ -DHADD (7 $\alpha$ ,12 $\beta$ -dihydroxy-androsta-1,4-diene-  
960 3,17-dione); V, THSATD (3,7,12-trihydroxy-9,10-*seco*-androsta-1,3,5(10)-triene-9,17-  
961 dione); VI, DH-HIP (3',7-dihydroxy-H-methyl-hexahydro-indanone-propanoate); VII,  
962 HOEDA (12 $\alpha$ -hydroxy-3-oxo-4,6-choldienoic acid); VIII, HATD (12-hydroxy-androsta-  
963 1,4,6-triene-3,17-dione); IX, DHSATD (3,12 $\beta$ -dihydroxy-9,10-*seco*-androsta-1,3,5(10),6-  
964 tetraene-9,17-dione).

965 **Fig 2.** Chromosome 2 of *Sphingobium* sp. strain Chol11 highlighting steroid-specific  
966 proteome signatures. Distinct steroid degradation gene clusters are labelled and  
967 numbered according to the text. Rings from outside to inside: (i) Localization of genes  
968 encoding orthologs to enzymes involved in different phases of steroid degradation  
969 based on reciprocal BLASTp analyses similar to (29) (Table S1), (ii-iv) Genes encoding  
970 proteins with >|1.5|-fold abundance changes under at least one test condition according  
971 to 2D-DIGE with glucose-grown cells as reference, abundance changes for cells grown  
972 with (ii) cholate, (iii) deoxycholate or (iv) 12 $\beta$ -DHADD, (v) coding sequences transcribed  
973 in clockwise direction and (vi) coding sequences transcribed in counter-clockwise  
974 direction.

975 **Fig 3.** Proposed model of bile-salt degradation in *Sphingobium* sp. strain Chol11 based  
976 on integrated bioinformatic, differential proteome and physiological analyses. Gene

977 locus tags are shortened to their numbers, e.g. 6 for Nov2c6. Color coding: (i) enzymes:  
978 red, function demonstrated experimentally; black, function predicted due to reciprocal  
979 BLASTp analyses with characterized steroid degradation proteins; grey, function  
980 predicted due to chromosomal location and automatic annotation; (ii) intermediates: red,  
981 intermediates identified in cell-free supernatants of strain Chol11 cultures degrading  
982 cholate; black, intermediates predicted due to pathway prediction; (iii) background: blue,  
983 A-ring oxidation and 7-OH elimination (phase 1); green, side-chain degradation (phase  
984 2); yellow, B-ring cleavage (phase 3); orange, degradation of the 9,10-*seco*-steroid  
985 (phase 4). Compound abbreviations: XIII, DOCTA (3,12-dioxo-4,6-choldienoc acid); XIV,  
986  $\Delta^{22}$ -DOCTRA (3,17-dioxo-4,6,(22*E*)-choltrienoic acid); XV,  $\Delta^3$ -7-OH-HIP (7-hydroxy-H-  
987 methyl-hexahydro-indanone-3-propenoate).

988 **Fig 4.** Differential protein expression in *Sphingobium* sp. strain Chol11 adapted to  
989 growth with cholate (CA, I in Fig 1), deoxycholate (DCA, XX in Fig 7), and 12 $\beta$ -DHADD  
990 (DHADD, IV in Fig 1) compared to glucose (G) as reference state. Proteins are ordered  
991 according to their location on chromosome 2. In most cases, results from only one  
992 protein identification and quantitation approach are displayed: 2D-DIGE (black to red  
993 gradient: protein abundance fold changes with glucose-grown cells as reference state),  
994 shotgun-MS analysis (Mascot scores in blue) or MS analysis of the membrane protein-  
995 enriched fraction (Mascot scores in green). In case of protein identification by multiple  
996 approaches, priority was for 2D DIGE followed by shotgun analyses. Proteins not  
997 identified with any method are shown in grey. The complete dataset can be found in  
998 Table S1. Red font: known proteins with experimentally verified functions.

999 **Fig 5.** (A) Steroid degradation gene cluster 1 (*nov2c06–20*) of *Sphingobium* sp. strain  
1000 Chol11 as well as similar clusters from other bile-salt degrading strains. (B)  
1001 Stereoinversion of the 12-OH of the cholate-degradation intermediate DHADD as found  
1002 in *C. testosteroni* (38). (C) Removal of the 7-OH of cholate-degradation intermediate  
1003 DH-HIP, which corresponds to the 12-OH in cholate (23). Compound abbreviations: XVI,  
1004 12 $\alpha$ -DHADD (7,12 $\alpha$ -dihydroxy-androsta-1,4-diene-3,17-dione); XVI, HADT (7-hydroxy-  
1005 androsta-1,4-diene-3,12,17-trione); XVIII, 3-hydroxy-H-methyl-hexahydro-indanone-6-  
1006 propenoate; XIX, 3-hydroxy-H-methyl-hexahydro-indanone-propanoate.

1007 **Fig 6.** (A) Steroid degradation gene cluster 2 (*nov2c218–232*) of *Sphingobium* sp. strain  
1008 Chol11 and similar clusters from other bile-salt degrading strains. (B) Bile-salt side chain  
1009 degradation mechanism in *P. stutzeri* Chol1 (black enzyme names) (19, 21, 23, 24) and  
1010 *R. jostii* RHA1 (grey enzyme names) (13). Colored: Corresponding enzymes in strain  
1011 Chol11 (colors correspond to genes in A), bold: experimentally verified, light: suggested  
1012 by bioinformatic analyses.

1013 **Fig 7.** (A) Steroid degradation gene cluster 3 (*nov2c344–370*) of *Sphingobium* sp. strain  
1014 Chol11 compared to the testosterone degradation gene cluster of *N. tardaugens*  
1015 NBC16725 (47). Connection lines indicate homologs. (B) Proposed degradation of 7-  
1016 hydroxy and 7-deoxy bile-salts in strain Chol11 (black) as opposed to degradation of 7-  
1017 hydroxy bile salts via the  $\Delta^{1,4}$ -variant (grey). Compound abbreviations: XXII, 7-hydroxy-  
1018 H-methyl-hexahydro-indanone-propanoate.

1019 **Fig 8.** Distribution of steroid degradation gene orthologs in 38 *Sphingomonas*,  
1020 *Sphingobium*, and *Novosphingobium* strains. Heat-map showing the BLAST identities  
1021 for reciprocal BLASTp hits to Hsh2 from *Sphingobium* sp. strain Chol11 and the bile-salt

1022 degradation proteins from *P. stutzeri* Chol1. Names of strains tested and found to use  
1023 the  $\Delta^{4,6}$ -variant pathway are in red. For accession numbers of the genomes see Fig S4.

1024 **Fig 9.** Degradation of bile salts by selected strains predicted to use the  $\Delta^{4,6}$ -variant of  
1025 the steroid degradation pathway. (A) Structures of the tested bile salts and predicted  
1026 intermediates detected in cell-free culture supernatants. (B,D,F) Growth on 1 mM bile  
1027 salts. Colors of symbols correspond to colors of substrate names. Values are means of  
1028 triplicates with standard deviation error bars, except in F where replicates on  
1029 chenodeoxycholate are plotted separately. (C,E,G) Accumulation of intermediates  
1030 during degradation of cholate in culture supernatants of the respective strains. See Fig 3  
1031 for structures not shown here. HPLC-UV chromatograms at 290 nm of culture  
1032 supernatants. Steroid compounds were identified by retention time, absorbance  
1033 spectrum and mass. Compound abbreviations: XXIV, 9,12-dihydroxy-androsta-4,6-  
1034 diene-3,17-dione; XXV: 12-hydroxy-androsta-4,6-diene-3,17-dione.

1035 **Fig 10.** Utilization of conjugated bile salts by *Sphingobium* sp. strain Chol11 and  
1036 transformation of conjugated bile salts by the amidases Nov2c227 and Nov2c229. (A)  
1037 Structures of conjugated bile salts and 7-keto metabolites. (B) Growth of strain Chol11  
1038 on 1 mM glycocholate (green squares) or glycine (yellow diamonds). (C) Transformation  
1039 of glycocholate by whole cells for 11 days, and (D) by cell-free extracts for 15 h. In C, D,  
1040 F and G: black trace, *E. coli* MG1655 pBBR1MCS-5 (empty vector control); light green,  
1041 *E. coli* MG1655 pBBR1MCS-5::*nov2c227*; and dark green, *E. coli* MG1655 pBBR1MCS-  
1042 5::*nov2c229*. (E) Growth of strain Chol11 on 1 mM taurocholate (green squares) and  
1043 taurine (yellow diamonds). (F) Transformation of taurocholate by whole cells for 4 days  
1044 and (G) by cell-free extracts for 15 h. Error bars indicate standard deviation (n=3).



1045 HPLC-MS base peak chromatograms measured in negative ion mode. Steroid  
1046 compounds were identified by retention time, absorbance spectrum and mass. Masses  
1047 are indicated for the respective deprotonated acids.

1048 **Tables**

1049 **Tab 1.** Primers used for construction of plasmids for heterologous expression.\*

| <b>Name</b>                | <b>Sequence</b>                         | <b>Restriction site</b> |
|----------------------------|-----------------------------------------|-------------------------|
| expfor_Chol11_<br>nov2c227 | AGACT <u>CGAGGG</u> GCTAAGCCCTTCGACAAGC | XhoI                    |
| exprev_Chol11_<br>nov2c227 | AGAT <u>CTAGATT</u> AAACCGCCGGACGCCTG   | XbaI                    |
| expfor_Chol11_<br>nov2c229 | AGACT <u>CGAGAG</u> AAAATCAACAAGATCGC   | XhoI                    |
| exprev_Chol11_<br>nov2c229 | AGAT <u>CTAGATT</u> ATTTGAGGTCAAAGACCT  | XbaI                    |
| M13 for (-43)              | AGGGTTTTCCAGTCACGACGTT                  |                         |
| M13 rev (-49)              | GAGCGGATAACAATTTACACAGG                 |                         |

1050 \* Underlined: restriction sites

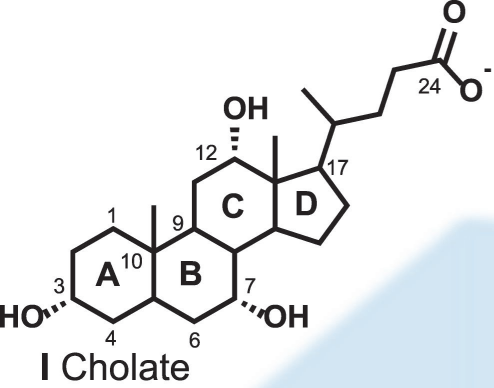

**$\Delta^{1,4}$ -Variant**

e.g. *Rhodococcus jostii* RHA1, *Comamonas testosteroni*, *Pseudomonas stutzeri* Chol1

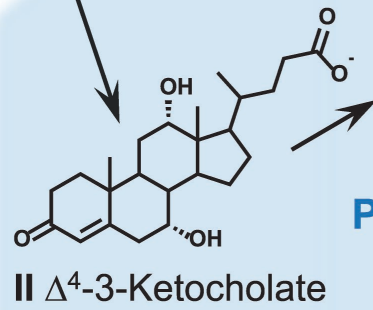

**Phase 1**

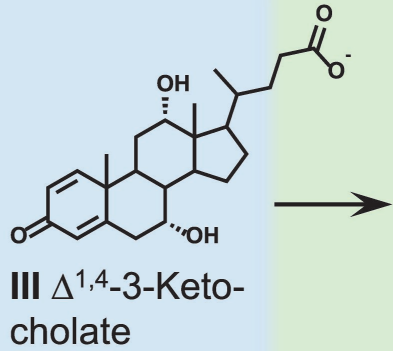

**Phase 2**

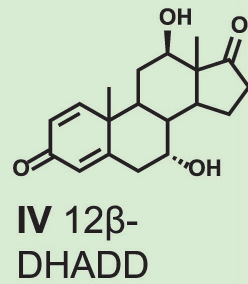

**Phase 3**

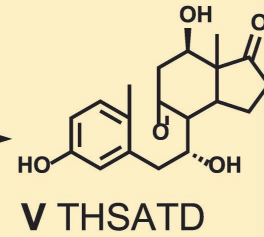

**Phase 4**

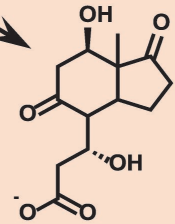

further degradation

Hsh2

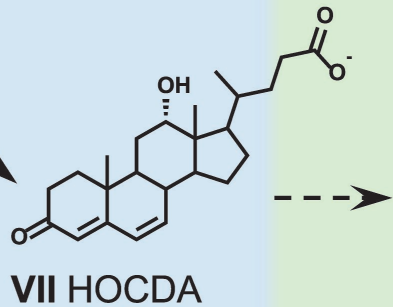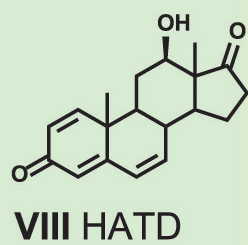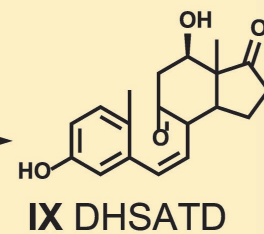

**$\Delta^{4,6}$ -Variant**

e.g. *Spingobium* sp. strain Chol11, *Novosphingobium tardaugens* NBRC16725, *Novosphingobium aromaticivorans* F199

# Homologs for

- A+B-ring degradation
- Side-chain degradation
- Former A+B-ring degradation
- C+D-ring degradation

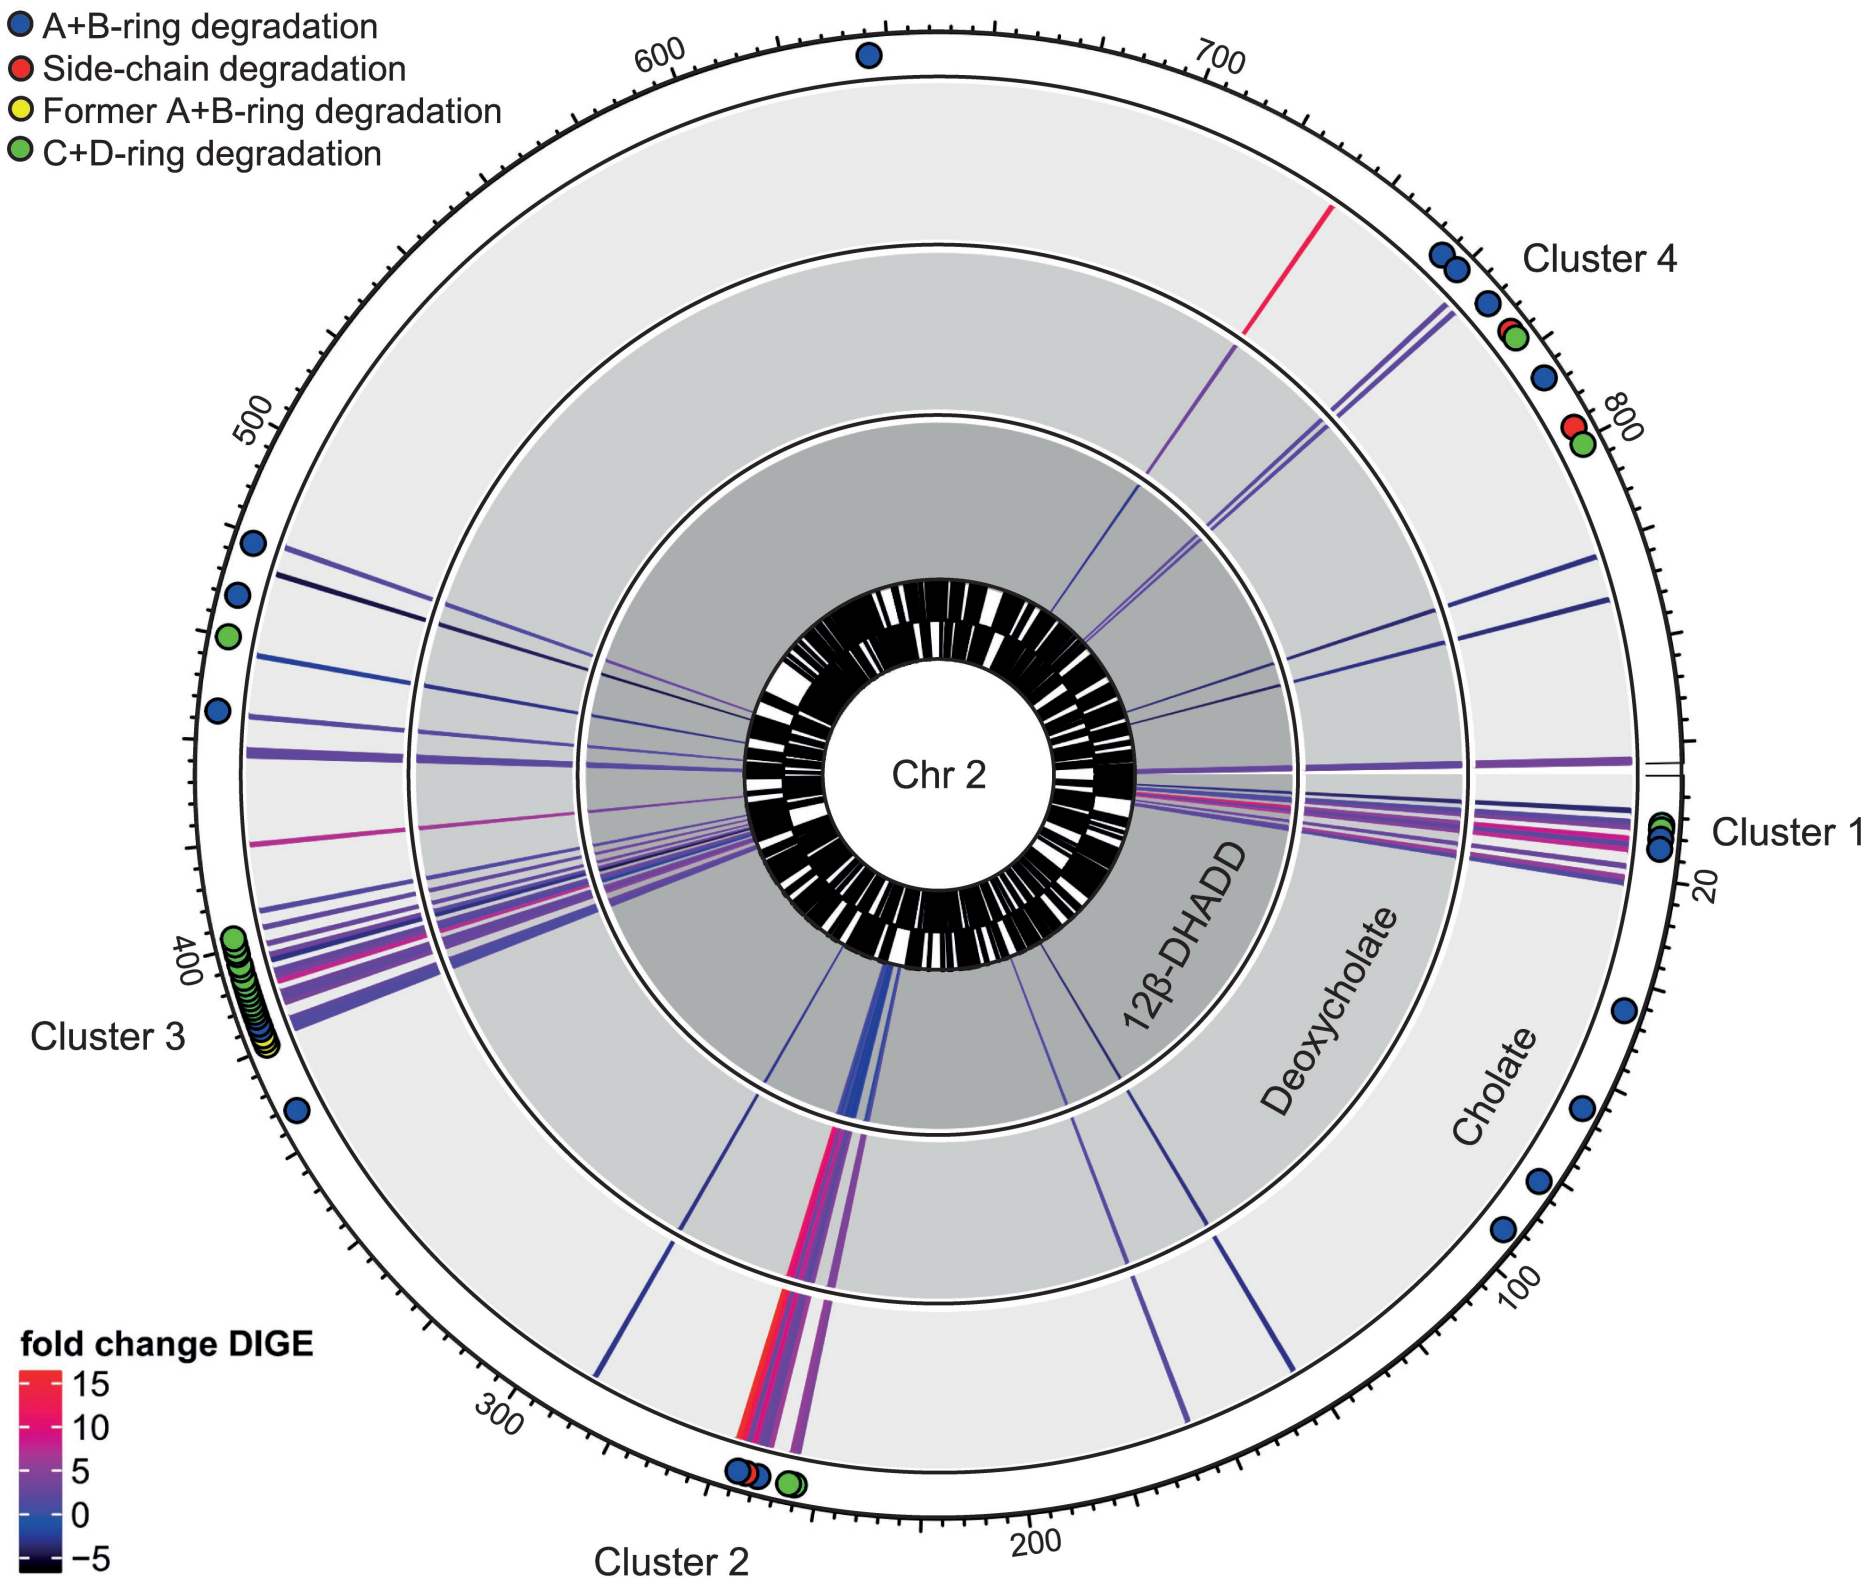

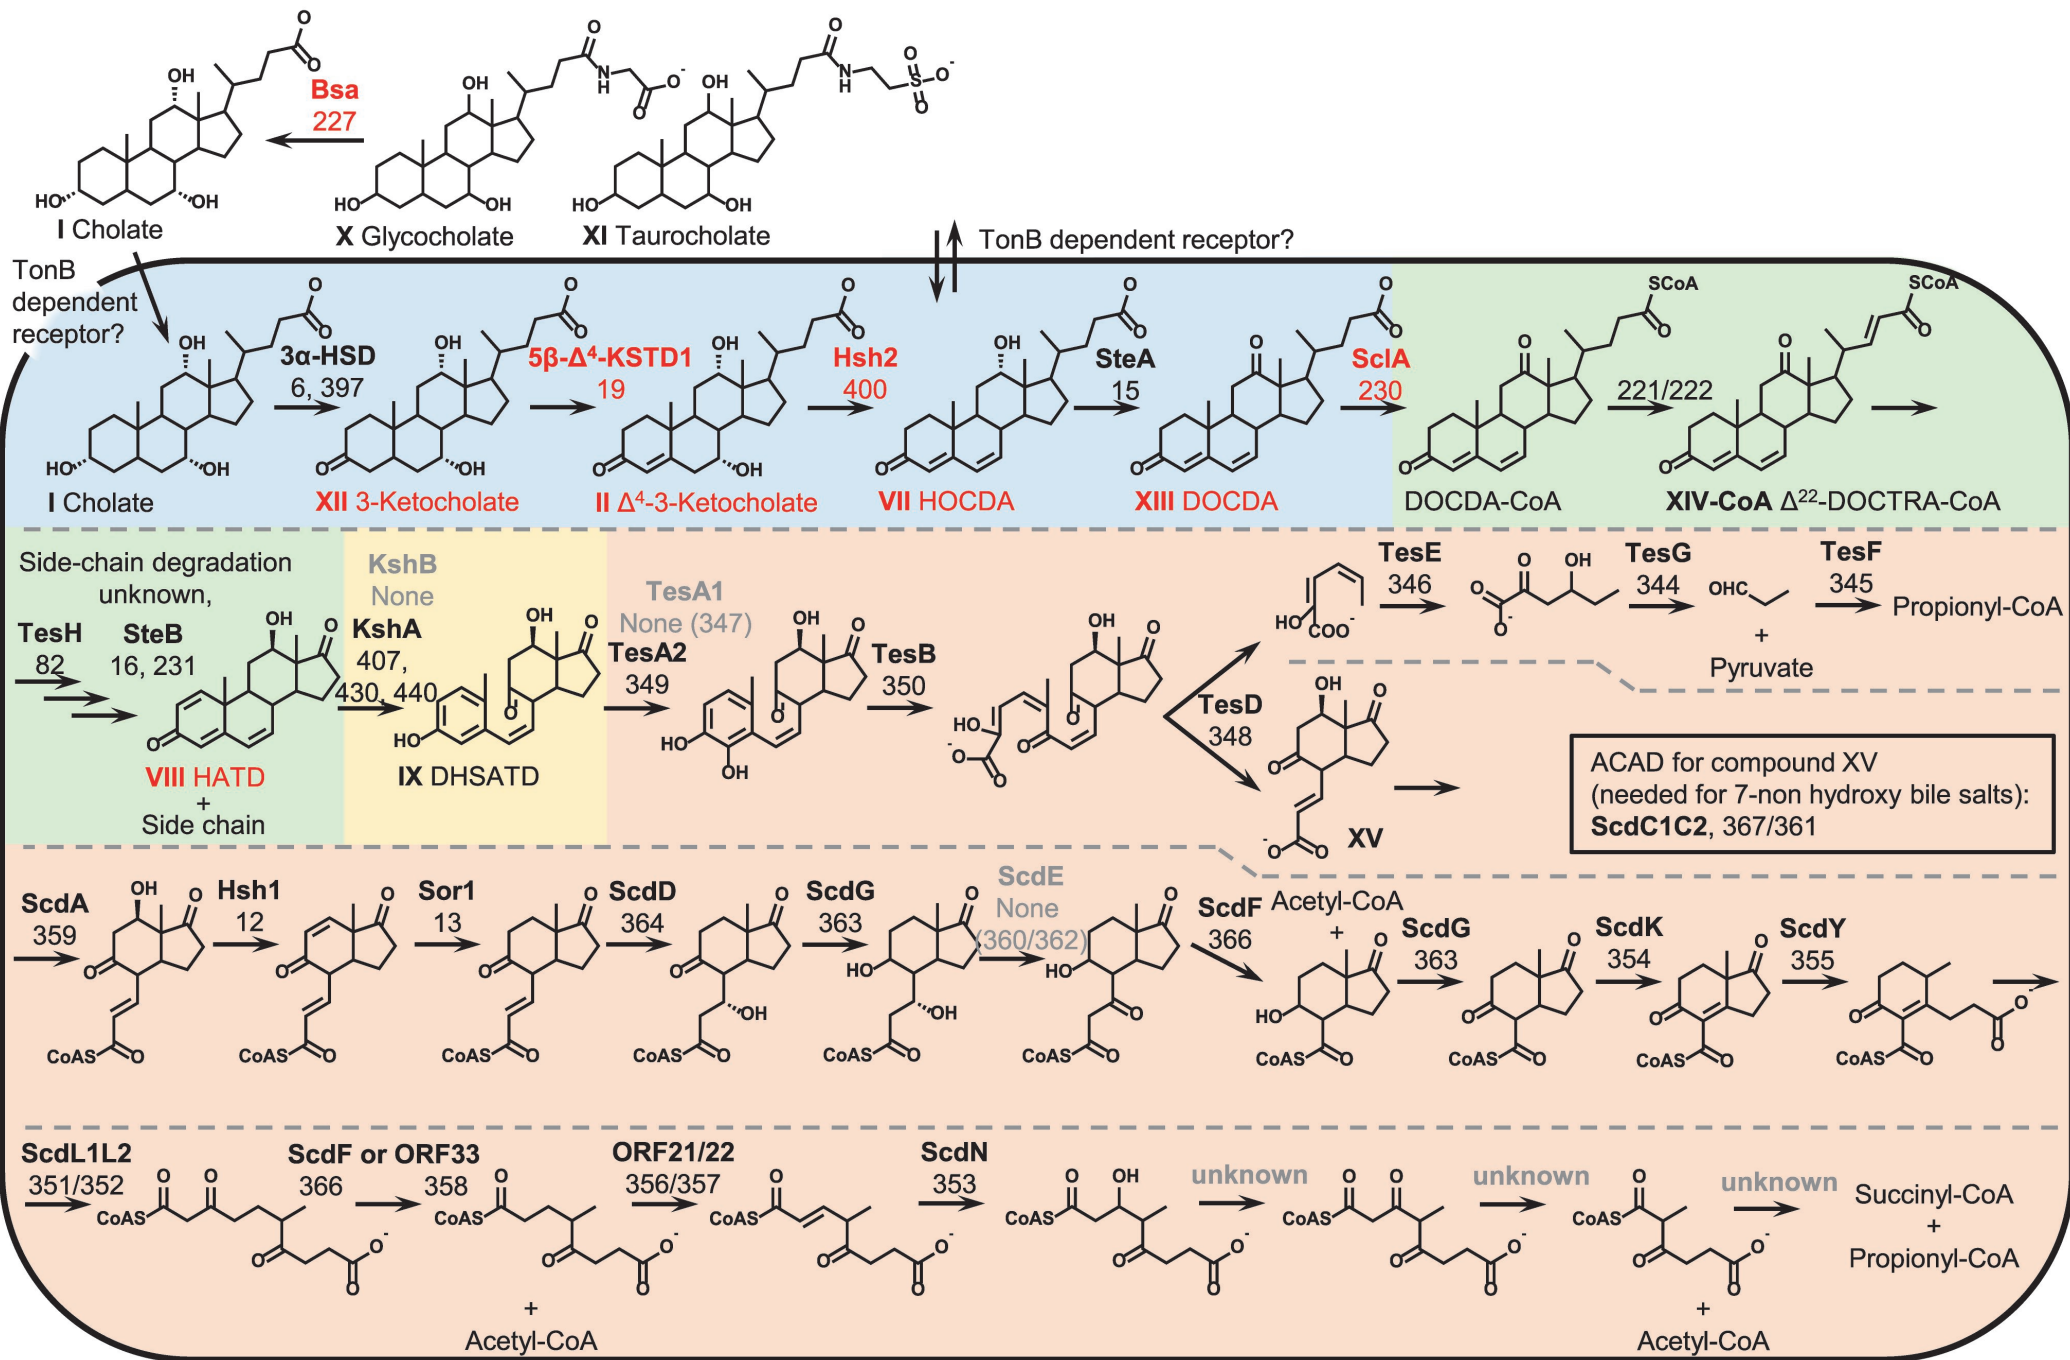

| Cluster  | Name or predicted function | Class of degradation                                   | CA                                            | PCA    | DHDD   | G      |       |
|----------|----------------------------|--------------------------------------------------------|-----------------------------------------------|--------|--------|--------|-------|
| Nov2c6   | 1                          | unknown                                                | unknown                                       | -2.7   | -2.7   | -2.5   | -     |
| Nov2c7   | 1                          | unknown                                                | unknown                                       | 507.4  | 446.1  | 291.7  | 145.2 |
| Nov2c8   | 1                          | unknown                                                | unknown                                       | 134.5  | 173.2  | 141.6  | 0.0   |
| Nov2c9   | 1                          | 12 $\beta$ -HSD                                        | Hydroxy group transformation                  | 2.1    | 1.8    | 1.3    | -     |
| Nov2c10  | 1                          | Monooxygenase                                          | unknown                                       | 4.2    | 3.7    | 2.0    | -     |
| Nov2c11  | 1                          | Transcriptional regulator                              | Regulation                                    |        |        |        |       |
| Nov2c12  | 1                          | Hsh1                                                   | Hydroxy group transformation                  | 7.9    | 5.1    | 9.7    | -     |
| Nov2c13  | 1                          | Sor1                                                   | Hydroxy group transformation                  | 2.2    | 2.4    | 2.2    | -     |
| Nov2c14  | 1                          | 3 $\alpha$ -HSD                                        | A-ring oxidation                              | 7.3    | 4.6    | 6.9    | -     |
| Nov2c15  | 1                          | SteA                                                   | Hydroxy group transformation                  | 838.5  | 699.6  | 757.8  | 135.3 |
| Nov2c16  | 1                          | SteB                                                   | Hydroxy group transformation                  | 651.8  | 521.5  | 586.5  | 187.3 |
| Nov2c17  | 1                          | 5 $\alpha$ - $\Delta^4$ -KSTD                          | A-ring oxidation                              | 3.1    | 2.9    | 3.2    | -     |
| Nov2c18  | 1                          | Monooxygenase                                          | unknown                                       |        |        |        |       |
| Nov2c19  | 1                          | <b>5<math>\beta</math>-<math>\Delta^4</math>-KSTD1</b> | <b>A-ring oxidation</b>                       | 5.5    | 6.1    | 2.6    | -     |
| Nov2c20  | 1                          | unknown                                                | unknown                                       | 1.8    | 1.7    | 2.1    | -     |
| Nov2c66  | none                       | KshA                                                   | B-ring cleavage                               | 0.0    | 0.0    | 0.0    | 176.0 |
| Nov2c82  | none                       | $\Delta^1$ -KSTD                                       | A-ring oxidation                              |        |        |        |       |
| Nov2c150 | none                       | TonB-dependent receptor                                | Transport                                     | 2.1    | 1.9    | 1.3    | -     |
| Nov2c218 | 2                          | 7 $\alpha$ -HSD                                        | Hydroxy group transformation                  | 365.1  | 378.4  | 0.0    | 0.0   |
| Nov2c219 | 2                          | Thioesterase                                           | unknown                                       | 300.1  | 301.4  | 0.0    | 0.0   |
| Nov2c220 | 2                          | Thioesterase                                           | unknown                                       | 60.5   | 0.0    | 0.0    | 0.0   |
| Nov2c221 | 2                          | ACAD subunit A                                         | Side-chain degradation                        | 4.4    | 4.5    | 1.9    | -     |
| Nov2c222 | 2                          | ACAD subunit B                                         | Side-chain degradation                        | 5.5    | 4.3    | -1.1   | -     |
| Nov2c223 | 2                          | Transcriptional regulator                              | Regulation                                    | 222.5  | 164.3  | 0.0    | 156.5 |
| Nov2c224 | 2                          | Transcriptional regulator                              | Regulation                                    | 133.8  | 102.8  | 0.0    | 0.0   |
| Nov2c225 | 2                          | MFS transporter                                        | Transport                                     | 262.0  | 169.8  | 0.0    | 0.0   |
| Nov2c226 | 2                          | 7 $\alpha$ -HSD                                        | Hydroxy group transformation                  | 5.9    | 4.4    | -1.2   | -     |
| Nov2c227 | 2                          | <b>Bsa</b>                                             | <b>Degradation of conjugated bile salts</b>   | 3.0    | 2.3    | -1.6   | -     |
| Nov2c228 | 2                          | KshA                                                   | B-ring cleavage?                              | 3.4    | 3.5    | -1.2   | -     |
| Nov2c229 | 2                          | Amidase                                                | unknown                                       | 8.9    | 7.8    | -1.5   | -     |
| Nov2c230 | 2                          | <b>ScIA</b>                                            | <b>Side chain</b>                             | 3.3    | 3.3    | 1.3    | -     |
| Nov2c231 | 2                          | 12 $\beta$ -HSD                                        | AB ring                                       | 11.7   | 8.8    | -1.0   | -     |
| Nov2c232 | 2                          | TonB-dependent receptor                                | Transport                                     | 15.0   | 10.5   | 1.6    | -     |
| Nov2c344 | 3                          | TesG                                                   | Steroid nucleus degradation                   | 1.8    | 1.6    | 2.3    | -     |
| Nov2c345 | 3                          | TesF                                                   | Steroid nucleus degradation                   | 1.7    | 1.5    | 2.3    | -     |
| Nov2c346 | 3                          | TesE                                                   | Steroid nucleus degradation                   | 2.5    | 2.0    | 3.3    | -     |
| Nov2c347 | 3                          | Flavin reductase                                       | (Steroid nucleus degradation)                 | 263.1  | 227.1  | 280.3  | 0.0   |
| Nov2c348 | 3                          | TesD                                                   | Steroid nucleus degradation                   | 526.8  | 425.8  | 505.4  | 333.2 |
| Nov2c349 | 3                          | TesA2                                                  | Steroid nucleus degradation                   | 3.8    | 3.4    | 4.8    | -     |
| Nov2c350 | 3                          | TesB                                                   | Steroid nucleus degradation                   | 2.6    | 2.7    | 2.8    | -     |
| Nov2c351 | 3                          | ScdL1                                                  | Steroid nucleus degradation                   | 3.1    | 2.9    | 4.0    | -     |
| Nov2c352 | 3                          | ScdL2                                                  | Steroid nucleus degradation                   | 1026.7 | 937.5  | 1069.0 | 390.0 |
| Nov2c353 | 3                          | ScdN                                                   | Steroid nucleus degradation                   | 7.5    | 7.1    | -1.4   | -     |
| Nov2c354 | 3                          | ScdK                                                   | Steroid nucleus degradation                   | 3.7    | 1.8    | 1.9    | -     |
| Nov2c355 | 3                          | ScdY                                                   | Steroid nucleus degradation                   | 2.7    | 2.6    | 3.4    | -     |
| Nov2c356 | 3                          | ORF21                                                  | Steroid nucleus degradation                   | 882.2  | 854.4  | 957.3  | 287.2 |
| Nov2c357 | 3                          | ORF22                                                  | Steroid nucleus degradation                   | -2.2   | -2.3   | -3.4   | -     |
| Nov2c358 | 3                          | ORF33                                                  | Steroid nucleus degradation                   | 674.5  | 584.3  | 576.3  | 194.4 |
| Nov2c359 | 3                          | CoA-transferase                                        | Steroid nucleus degradation                   | 3.3    | 2.2    | 3.0    | -     |
| Nov2c360 | 3                          | ScdE                                                   | Steroid nucleus degradation                   | 245.5  | 212.7  | 290.0  | 0.0   |
| Nov2c361 | 3                          | ScdC2                                                  | Steroid nucleus degradation                   | 3.0    | 2.4    | 3.4    | -     |
| Nov2c362 | 3                          | ScdC                                                   | Steroid nucleus degradation                   | 503.4  | 475.5  | 423.3  | 0.0   |
| Nov2c362 | 3                          | Alcohol dehydrogenase                                  | unknown                                       | 260.9  | 155.9  | 323.8  | 0.0   |
| Nov2c363 | 3                          | ScdG                                                   | Steroid nucleus degradation                   | 2.6    | 2.5    | 3.4    | -     |
| Nov2c364 | 3                          | ScdD                                                   | Steroid nucleus degradation                   | 663.2  | 603.9  | 590.0  | 322.0 |
| Nov2c365 | 3                          | Steroid- $\Delta^5$ -isomerase                         | unknown                                       | 402.5  | 314.9  | 374.1  | 312.9 |
| Nov2c366 | 3                          | ScdF                                                   | Steroid nucleus degradation                   | 1.8    | 1.6    | 2.2    | -     |
| Nov2c367 | 3                          | ScdC1                                                  | Steroid nucleus degradation                   | 1285.2 | 1196.5 | 1304.5 | 398.8 |
| Nov2c378 | none                       | TonB-dependent receptor                                | Transport                                     | 7.0    | 6.0    | 3.5    | -     |
| Nov2c397 | none                       | 3 $\alpha$ -HSD                                        | A-ring oxidation                              | 786.8  | 710.2  | 630.9  | 647.7 |
| Nov2c400 | none                       | <b>Hsh2</b>                                            | <b>Elimination of 7<math>\alpha</math>-OH</b> | 388.7  | 247.4  | 160.1  | 162.5 |
| Nov2c401 | none                       | TonB-dependent receptor                                | Transport                                     | 2.1    | 2.0    | 1.8    | -     |
| Nov2c407 | none                       | KshA                                                   | B-ring cleavage                               | 966.3  | 888.2  | 928.0  | 565.9 |
| Nov2c430 | none                       | KshA                                                   | B-ring cleavage                               | 0.0    | 54.9   | 140.7  | 0.0   |
| Nov2c440 | none                       | KshA                                                   | B-ring cleavage                               | 944.6  | 855.4  | 0.0    | 578.0 |
| Nov2c659 | 4                          | TonB-dependent receptor                                | Transport                                     | 12.0   | 3.4    | -2.0   | -     |
| Nov2c683 | 4                          | 3 $\alpha$ -HSD                                        | A-ring oxidation                              | 767.3  | 674.6  | 598.9  | 426.3 |
| Nov2c687 | 4                          | 12 $\alpha$ -HSD                                       | Hydroxy group transformation                  | 639.0  | 513.7  | 252.9  | 0.0   |
| Nov2c695 | 4                          | $\Delta^1$ -KSTD                                       | A-ring oxidation                              | 704.3  | 672.9  | 569.0  | 234.7 |

**2D-DIGE**

15.0

10.0

5.0

0.0

-5.0

**Shotgun MS**

0.0

100.0

500.0

1000.0

1500.0

**Membrane**

0.0

150.0

300.0

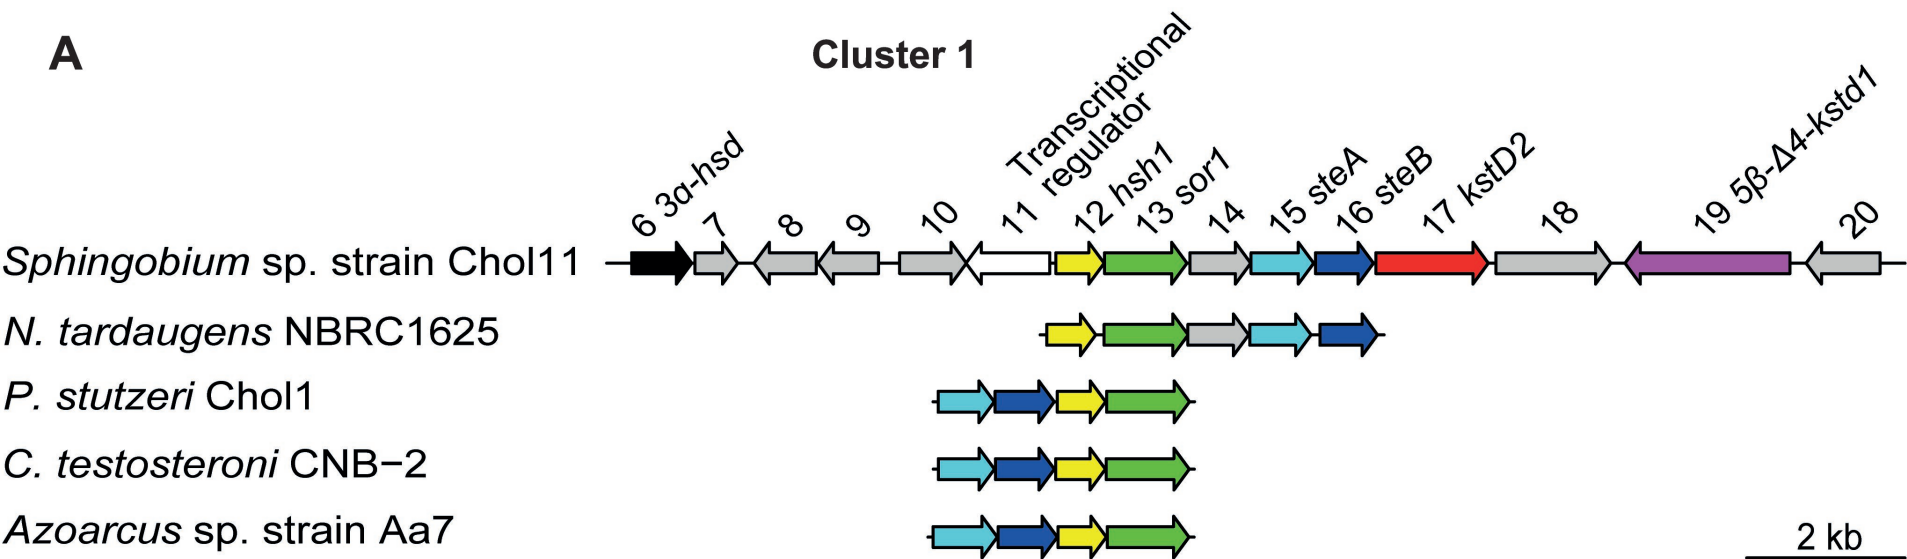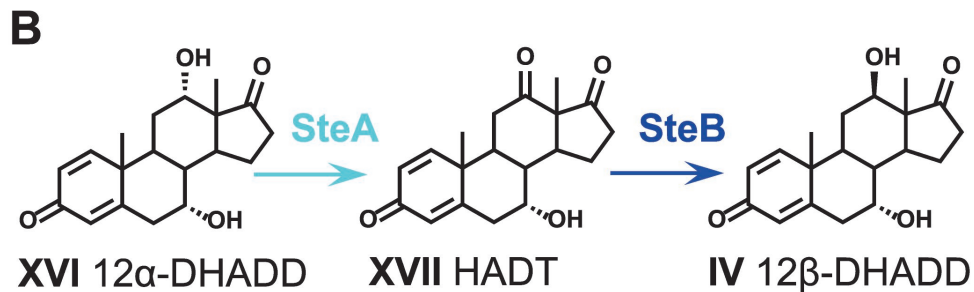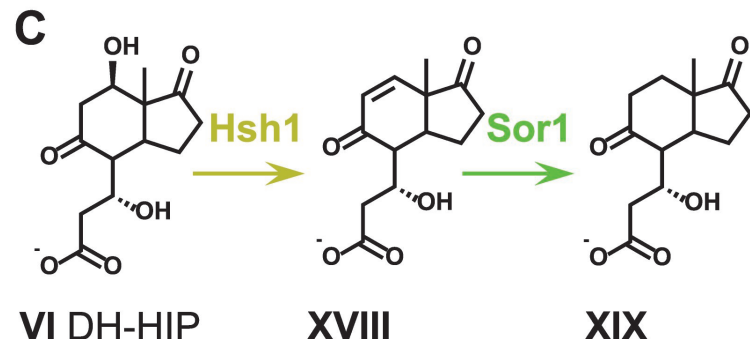

**A**

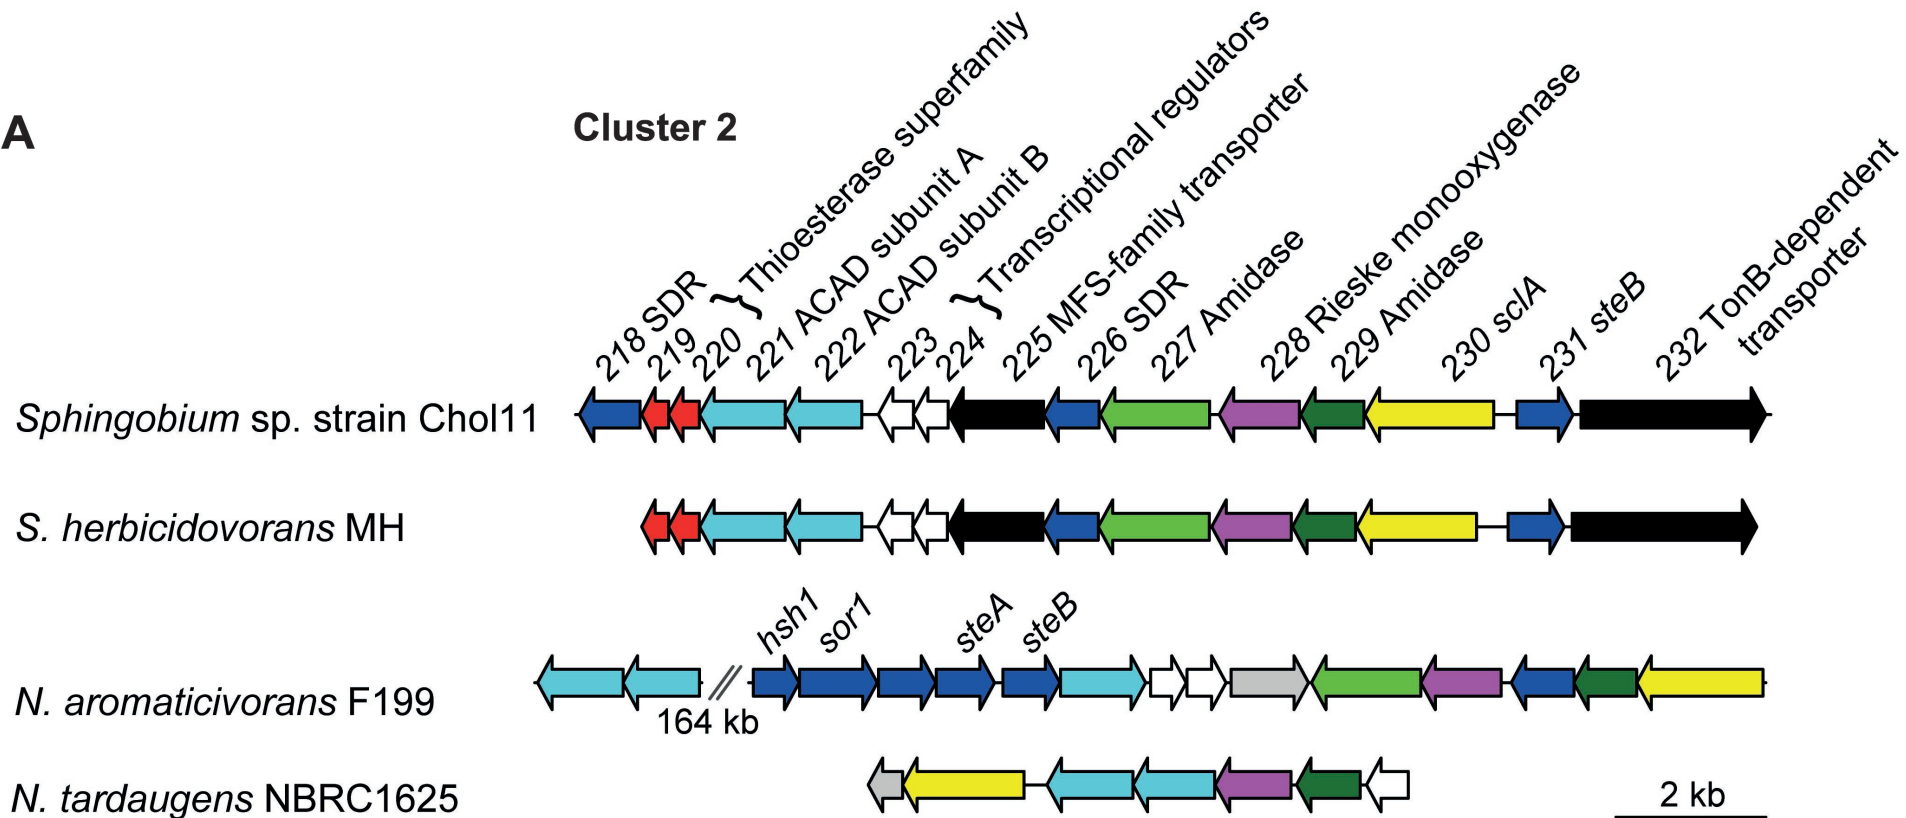

**B**

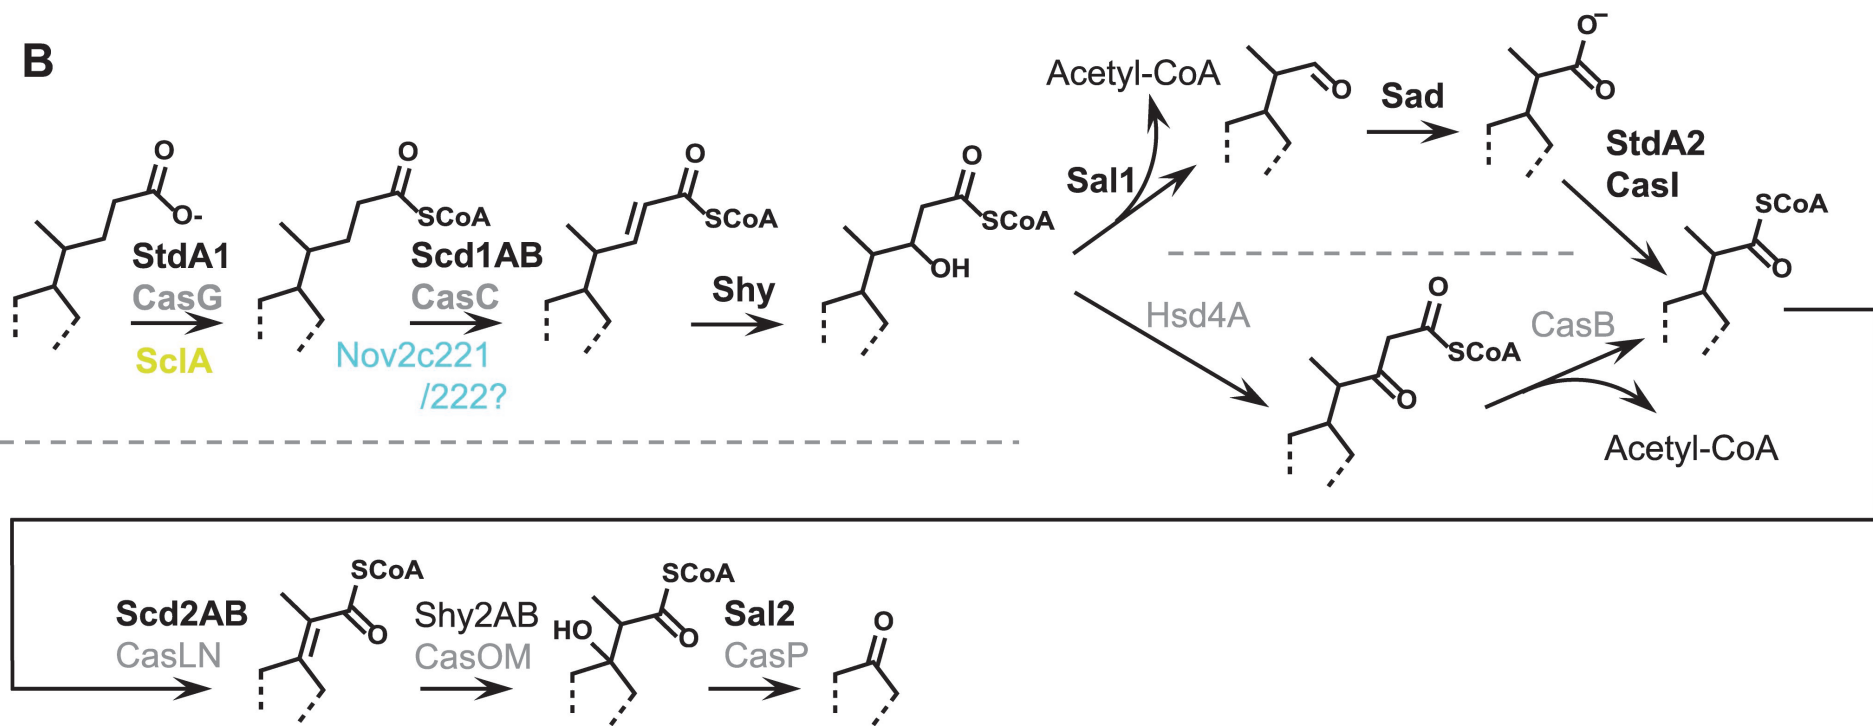



**A****Cluster 3**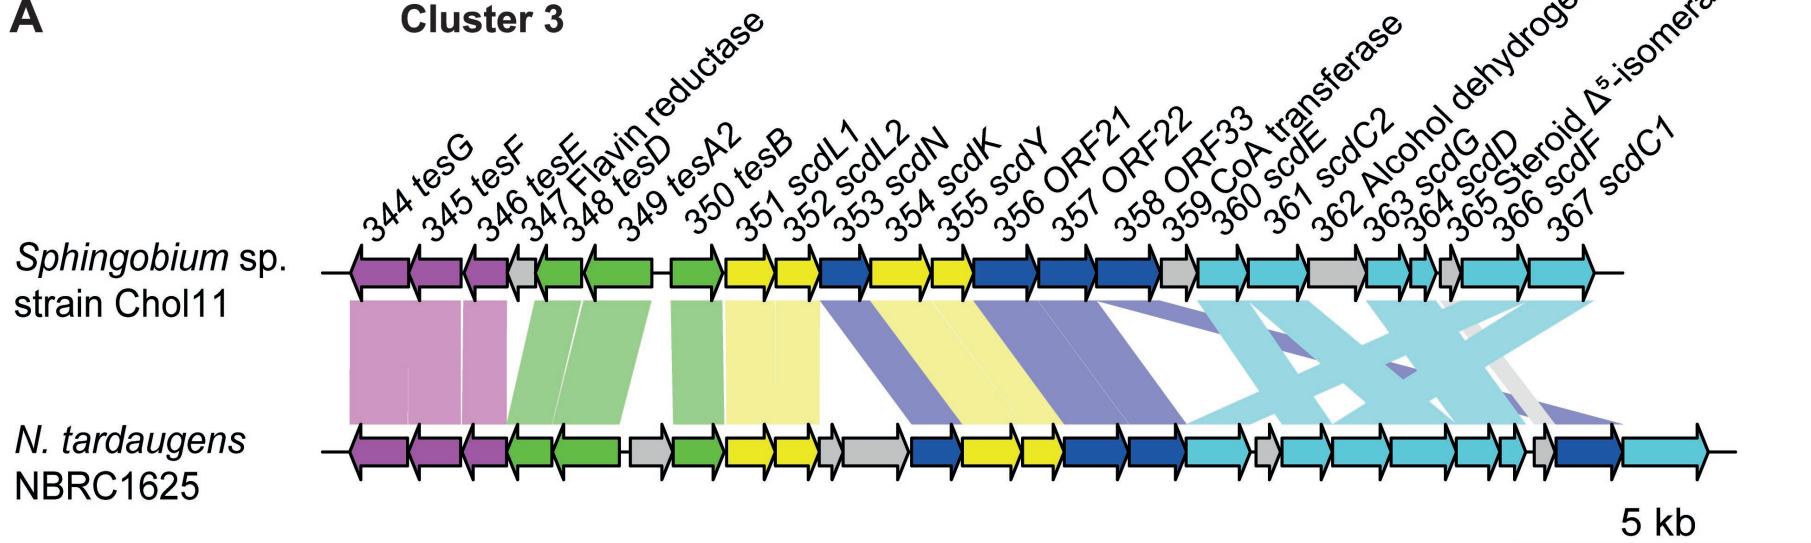**B**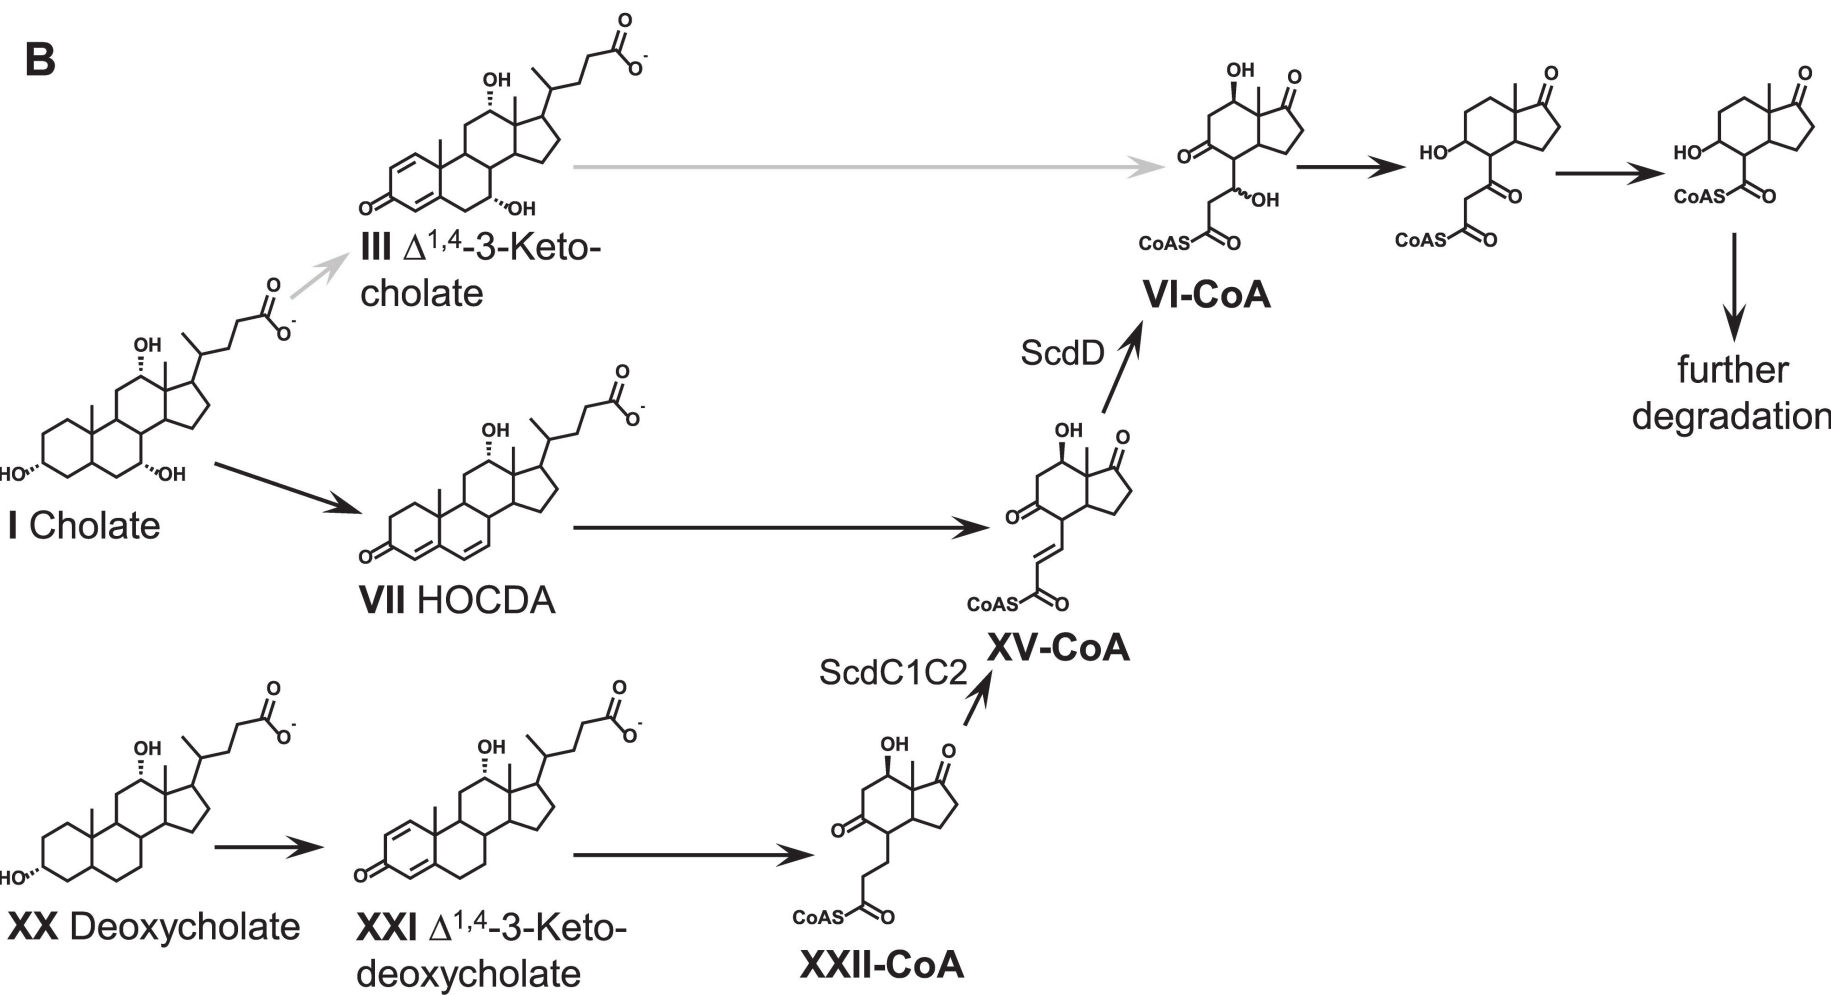

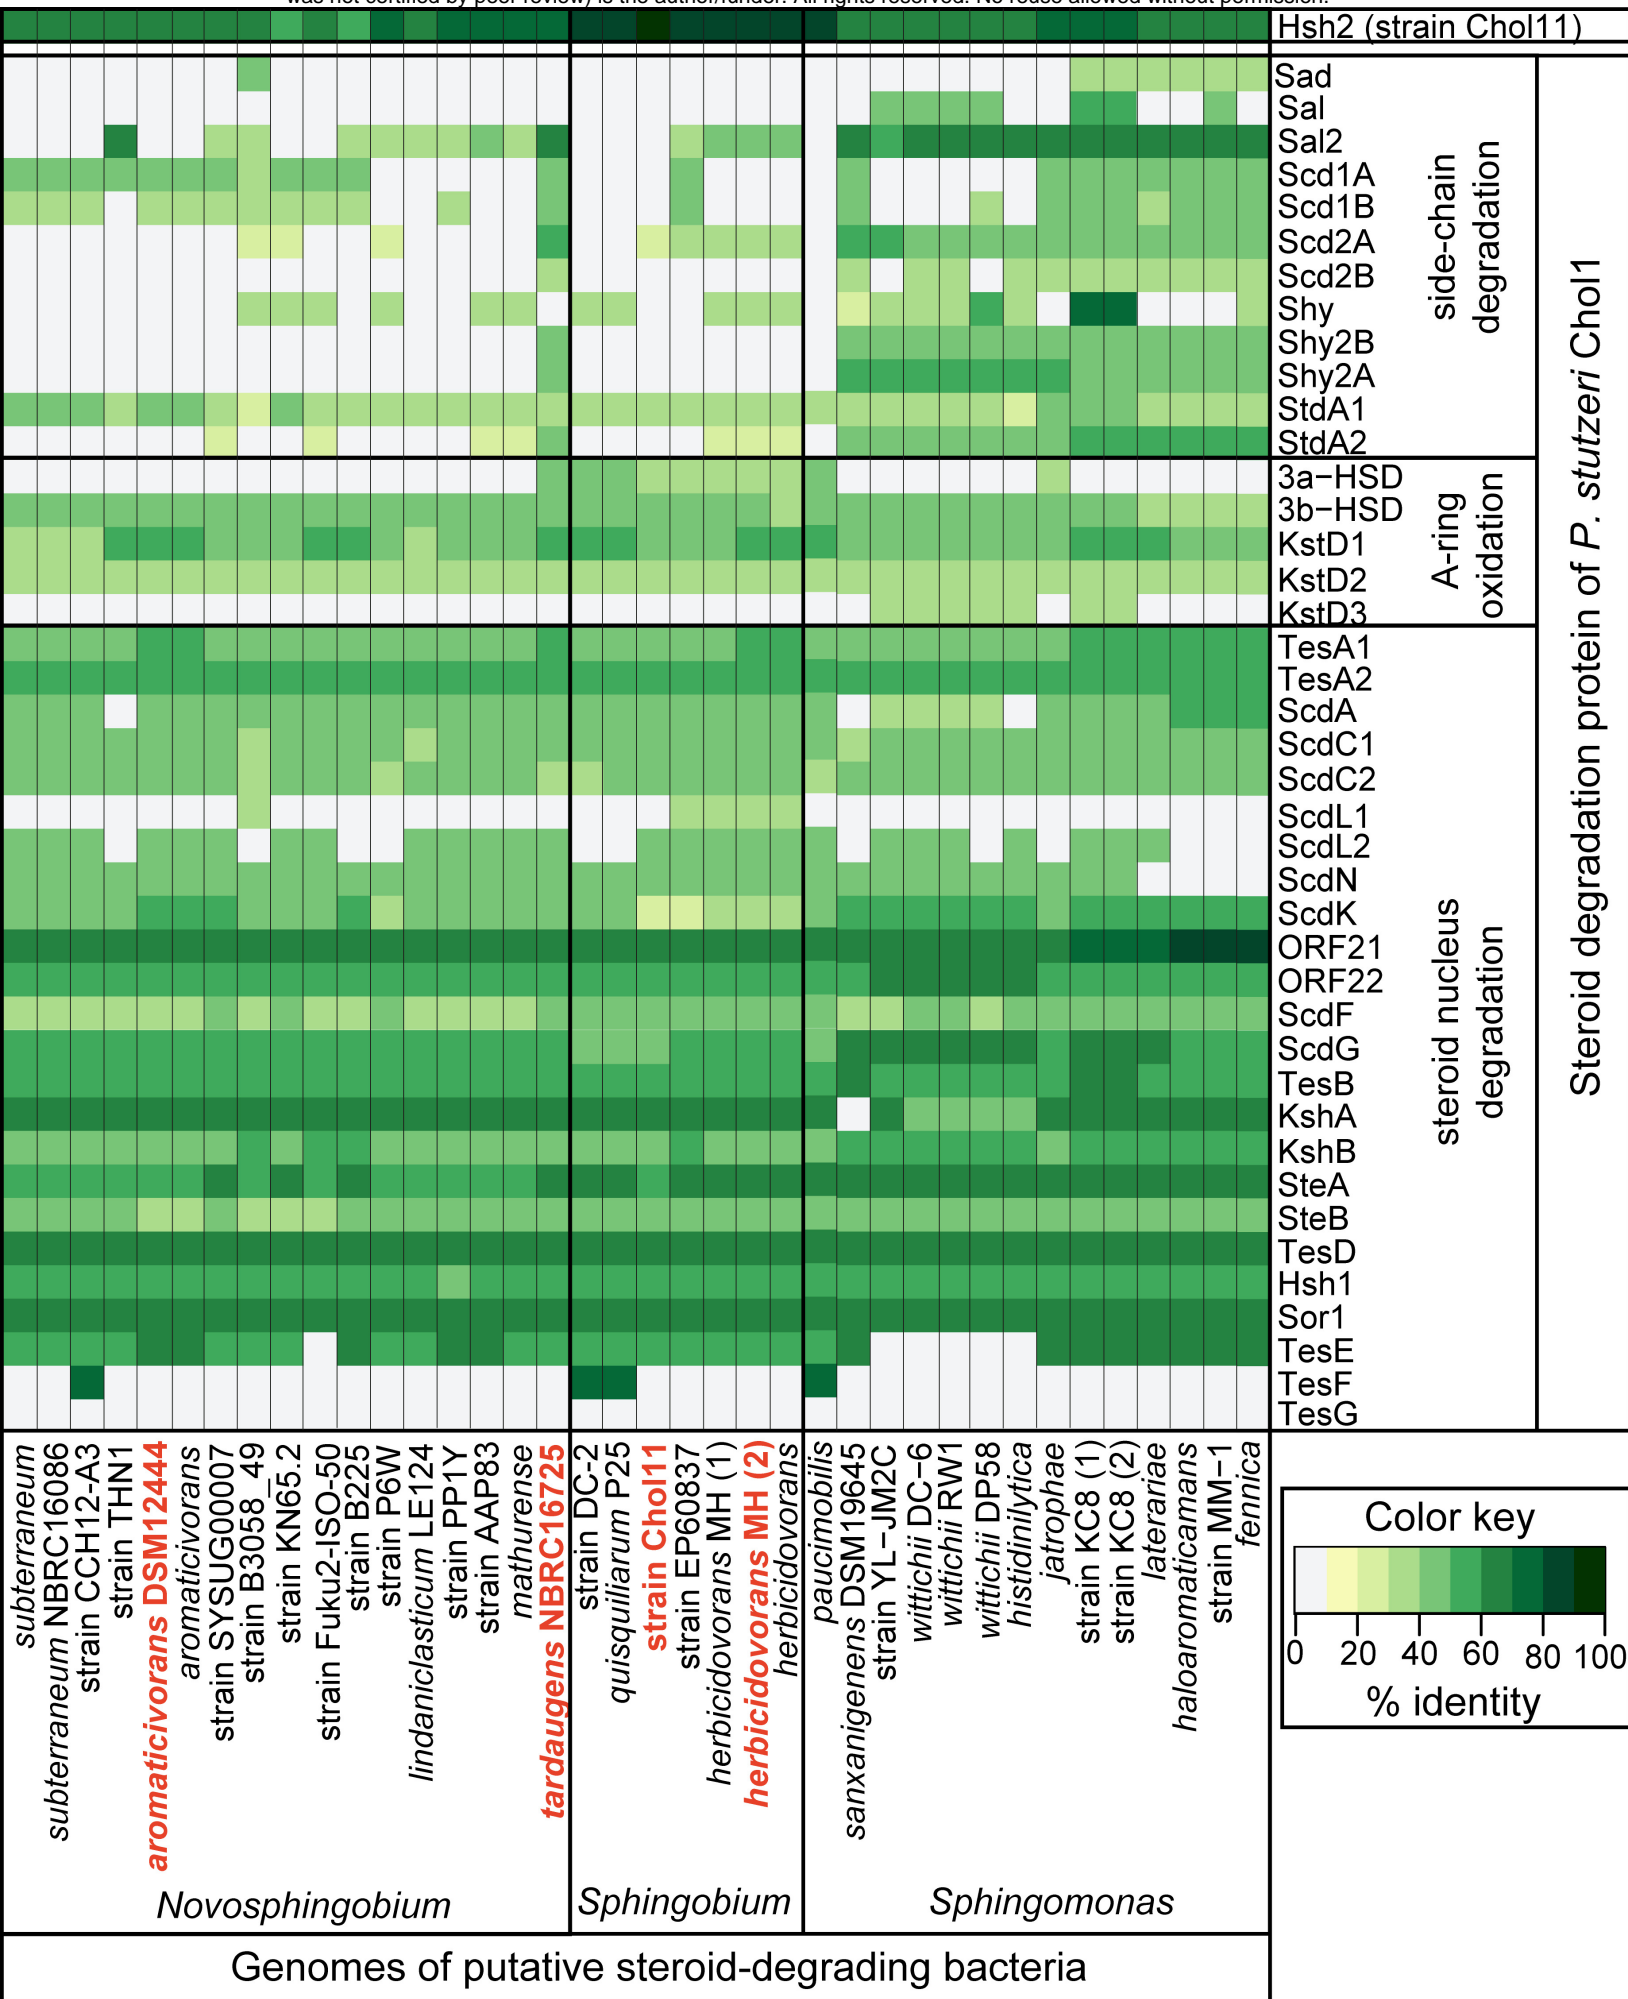

**A**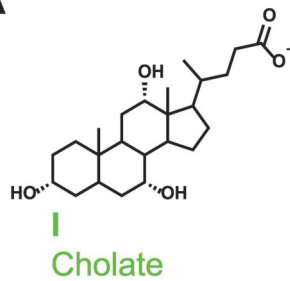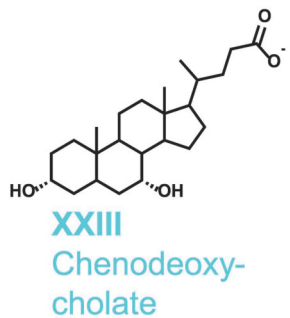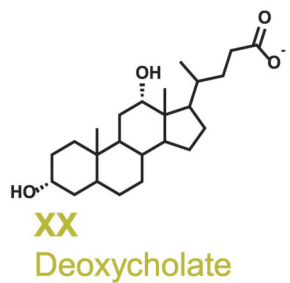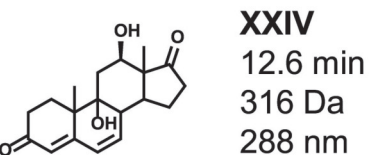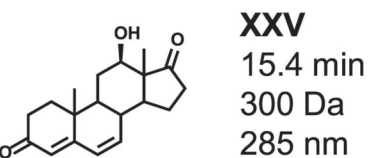**B**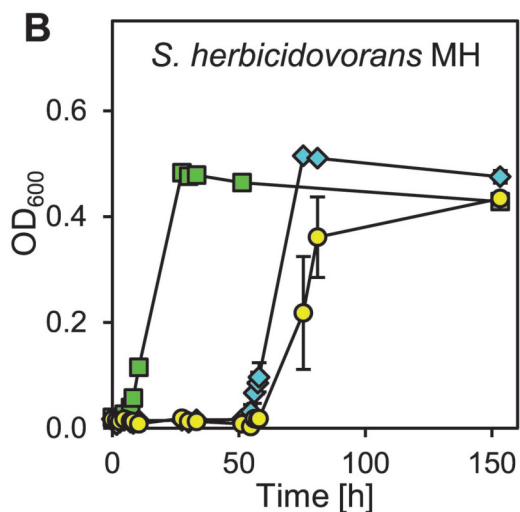**C**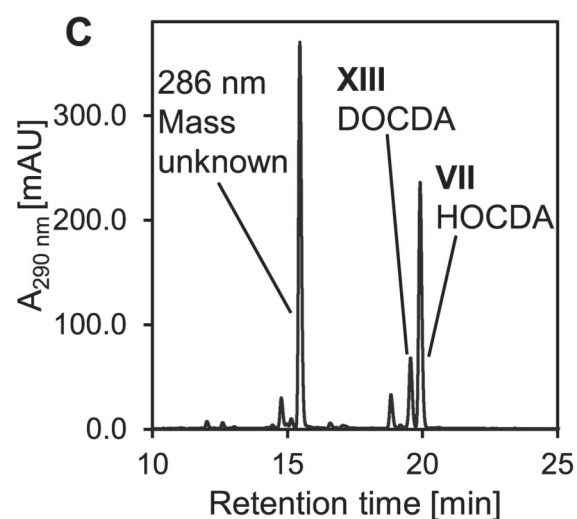**D**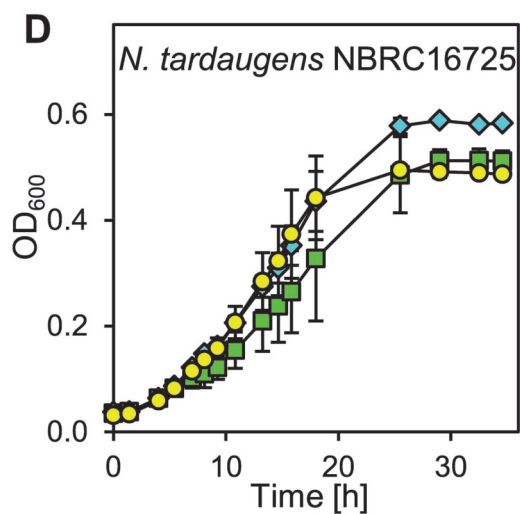**E**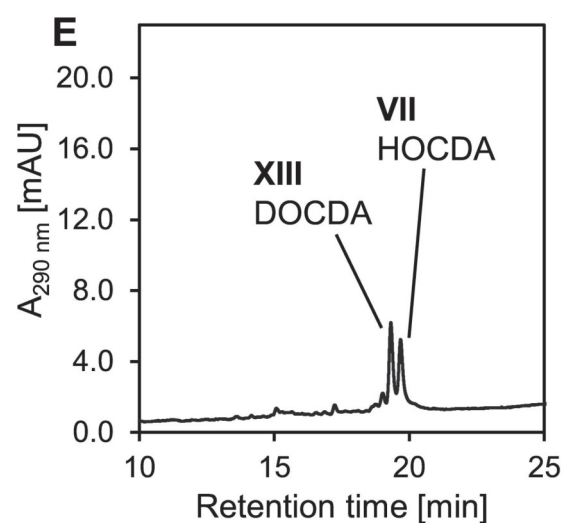**F**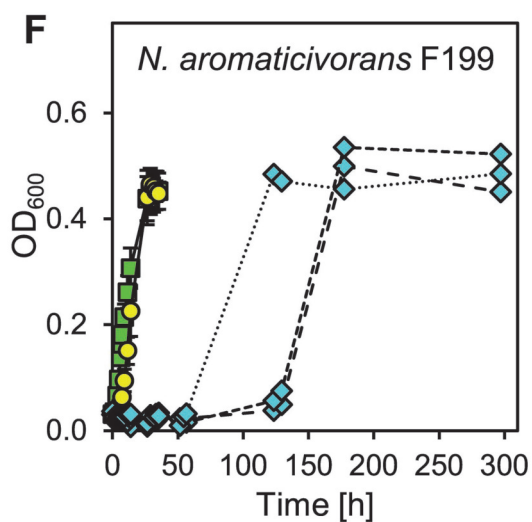**G**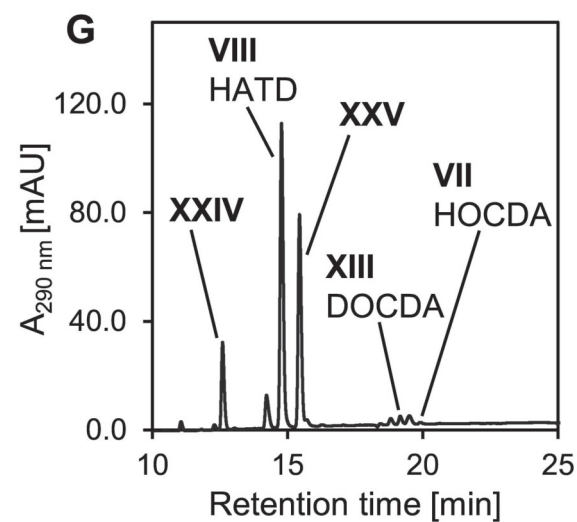

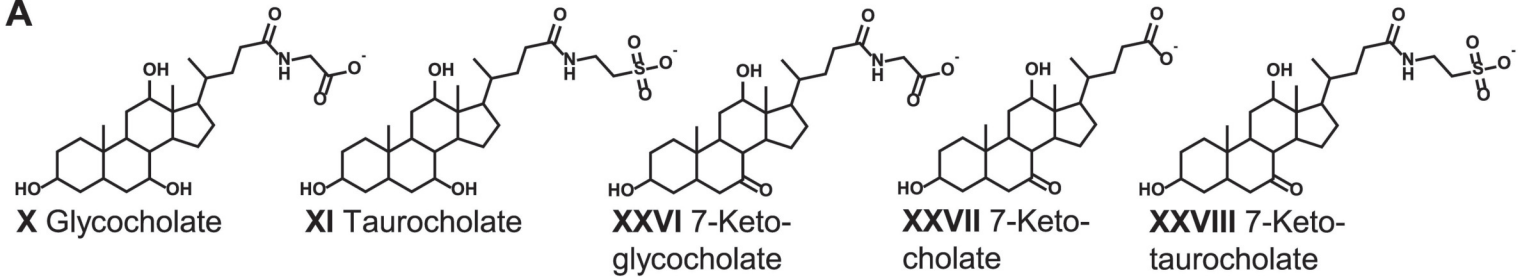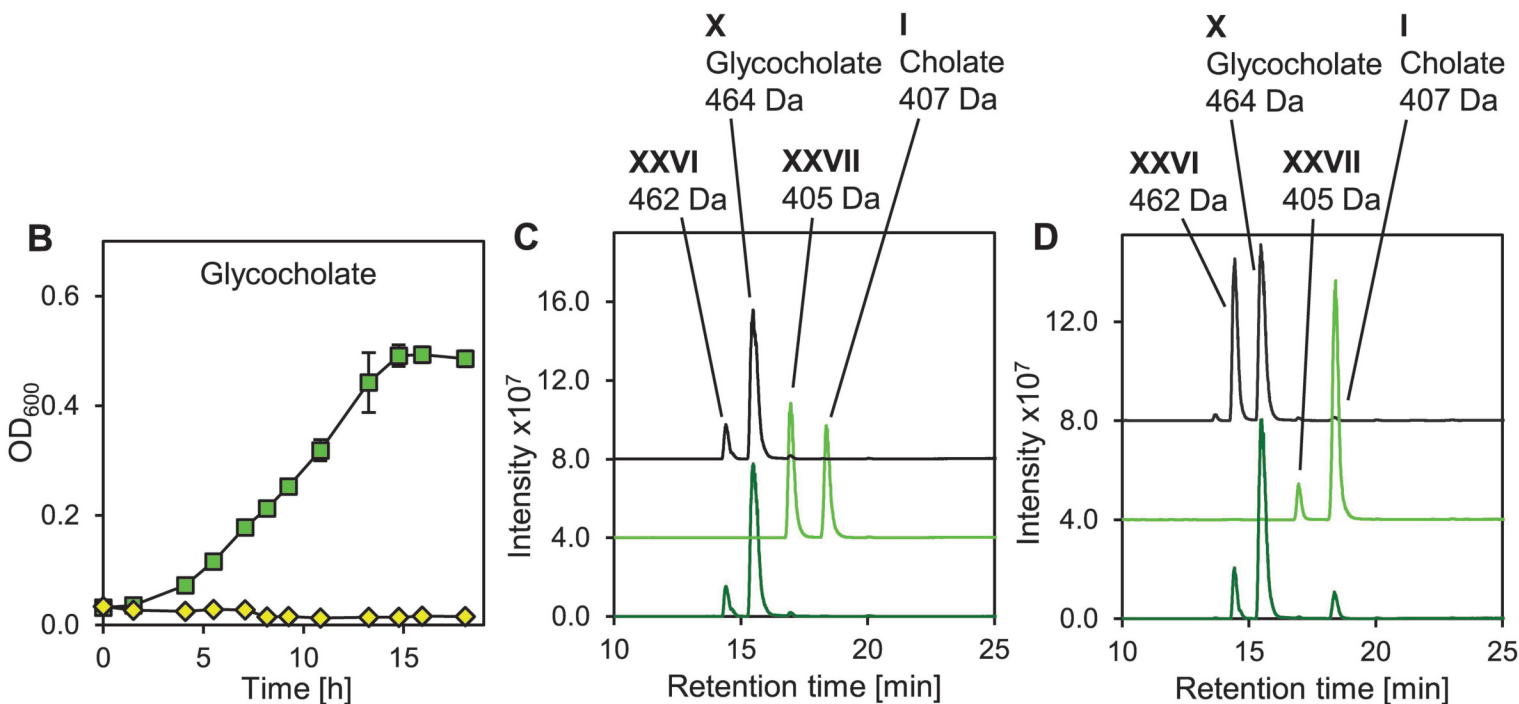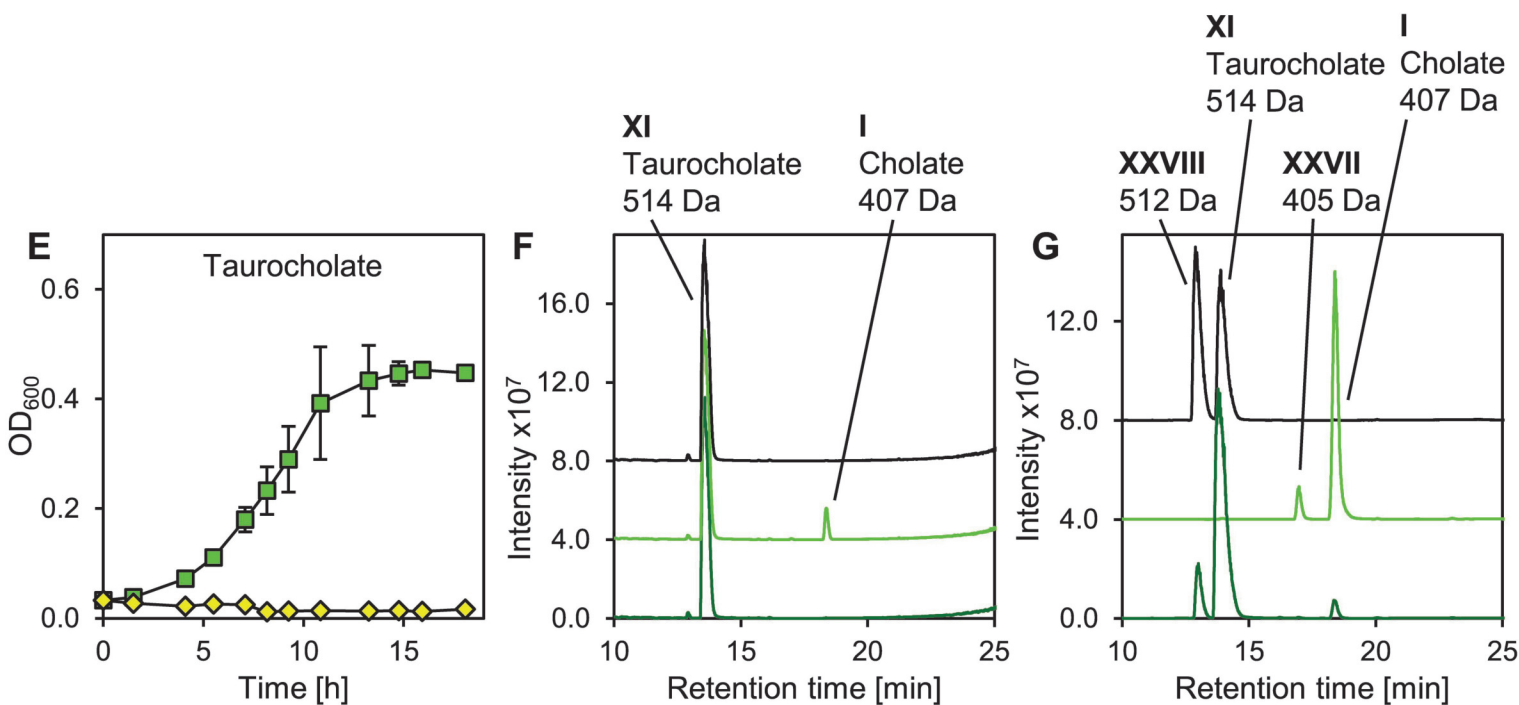

Source: https://www.biorxiv.org/content/10.1101/2021.05.19.444901v1.full.pdf
